# Supplementary material for: On the reduction of CO2 footprint via selective hydrodeoxygenation by ZnO–Ti3C2Tx catalyst under solvent-free conditions
Source: Royal Society of Chemistry journal article supplement (doi:10.1039/d3gc01260c), 2023-01-01
Supplement: d3gc01260c1.pdf [file d3gc01260c1.pdf]

### ELECTRONIC SUPPLEMENTARY INFORMATION

#### **On the reduction of CO<sub>2</sub> footprint via selective hydrodeoxygenation by ZnO-Ti<sub>3</sub>C<sub>2</sub>T<sub>x</sub> catalyst under solvent-free conditions**

Bhagirath Saini<sup>[a]</sup>, R. Krishnapriya<sup>[b]</sup>, Meena Yadav<sup>[a]</sup> Rahul Singhal<sup>[c]</sup>, Rakesh K Sharma<sup>[a]\*</sup>

<sup>[a]</sup>Sustainable Materials and Catalysis Research Laboratory (SMCRL), Department of Chemistry, Indian Institute of Technology Jodhpur, NH 65, Karwar, Jodhpur, Rajasthan, India, 342037 Tel.: +91 291 280 1303, E-mail: [rks@iitj.ac.in](mailto:rks@iitj.ac.in)

<sup>[b]</sup> Mechanical and Aerospace Engineering Department, College of Engineering, United Arab Emirate University, Al Ain 15551, UAE

<sup>[c]</sup>Department of Physics and Engineering Physics, Central Connecticut State University, New Britain, CT 06050, USA

#### **TABLE OF CONTENTS**

|                |                                                                                                                                                                                                          |
|----------------|----------------------------------------------------------------------------------------------------------------------------------------------------------------------------------------------------------|
| Figure S1      | High magnification SEM images of MXene catalyst at 1µm and 200nm.                                                                                                                                        |
| Figure S2-S6   | SEM image and EDX elemental mapping of Ti <sub>3</sub> C <sub>2</sub> T <sub>x</sub> , ZnO- Ti <sub>3</sub> C <sub>2</sub> T <sub>x</sub> - nanocomposites with different wt% of ZnO and ZnO nanoflakes. |
| Figure S7      | NH <sub>3</sub> TPD spectra of Ti <sub>3</sub> C <sub>2</sub> T <sub>x</sub> , and ZnO- Ti <sub>3</sub> C <sub>2</sub> T <sub>x</sub> nanocomposite.                                                     |
| Figure S8      | (a-c) GC chromatogram of pure methyl oleate and for biodiesel product over Ti <sub>3</sub> C <sub>2</sub> T <sub>x</sub> catalyst.                                                                       |
| Figure S9-S22  | GC chromatogram for biodiesel product over Ti <sub>3</sub> C <sub>2</sub> T <sub>x</sub> catalyst (MX-01 to MX-14).                                                                                      |
| Figure S23     | Conversion and selectivity of the methyl oleate using (a) MXene and (b) ZnO-MXene catalysts. The error bar representing the relative deviation is within 1.5%.                                           |
| Figure S24     | (a&c) The carbon balance for MXene and MXene-ZnO; (b) gas compositions using MXene catalyst (entry 13) and MXene-ZnO catalyst (entry 9).                                                                 |
| Figure S25     | (a-c) GC chromatogram of pure methyl oleate and for biodiesel product over ZnO-Ti <sub>3</sub> C <sub>2</sub> T <sub>x</sub> catalyst.                                                                   |
| Figure S26     | The possible reaction mechanism of selective hydrogenation of methyl oleate over MXene and MXene-ZnO.                                                                                                    |
| Figure S27-S37 | GC chromatogram for biodiesel product over 10wt% ZnO- Ti <sub>3</sub> C <sub>2</sub> T <sub>x</sub> (MXZ-10 A to MXZ-10 K).                                                                              |
| Figure S38-S39 | GC chromatogram for biodiesel product over 5wt% and 15wt% ZnO- Ti <sub>3</sub> C <sub>2</sub> T <sub>x</sub> (MXZ-5 L to MXZ-15 M).                                                                      |
| Figure S40     | (a and b) GC chromatogram of Ti <sub>3</sub> C <sub>2</sub> T <sub>x</sub> and ZnO-Ti <sub>3</sub> C <sub>2</sub> T <sub>x</sub> with variable catalyst loading.                                         |
| Figure S41     | Conversion and selectivity of (a) Ti <sub>3</sub> C <sub>2</sub> T <sub>x</sub> and (b) ZnO-Ti <sub>3</sub> C <sub>2</sub> T <sub>x</sub> up to 5 cycles at lower conversion reactions.                  |

|                |                                                                                                                                                                         |
|----------------|-------------------------------------------------------------------------------------------------------------------------------------------------------------------------|
| Figure S42-S45 | HRMS, $^1\text{H}$ and $^{13}\text{C}$ NMR spectra of hydrotreatment reaction.                                                                                          |
| Figure S47-49  | XRD, EDX elemental mapping and SEM image after the hydrotreatment process of $\text{Ti}_3\text{C}_2\text{T}_x$ and $\text{ZnO-Ti}_3\text{C}_2\text{T}_x$ nanocomposite. |
| Figure S50     | $^1\text{H}$ NMR of hydrotreatment reaction with time-dependent study.                                                                                                  |
| Figure S51     | (a) GC chromatogram of hydrotreatment reaction with time-dependent study; (b-c) Conversion and selectivity data of Entry 9 at 4, 8 and 13h.                             |
| Table S1       | Comparative study of MXene and MXene-ZnO catalyst with previously reported study.                                                                                       |

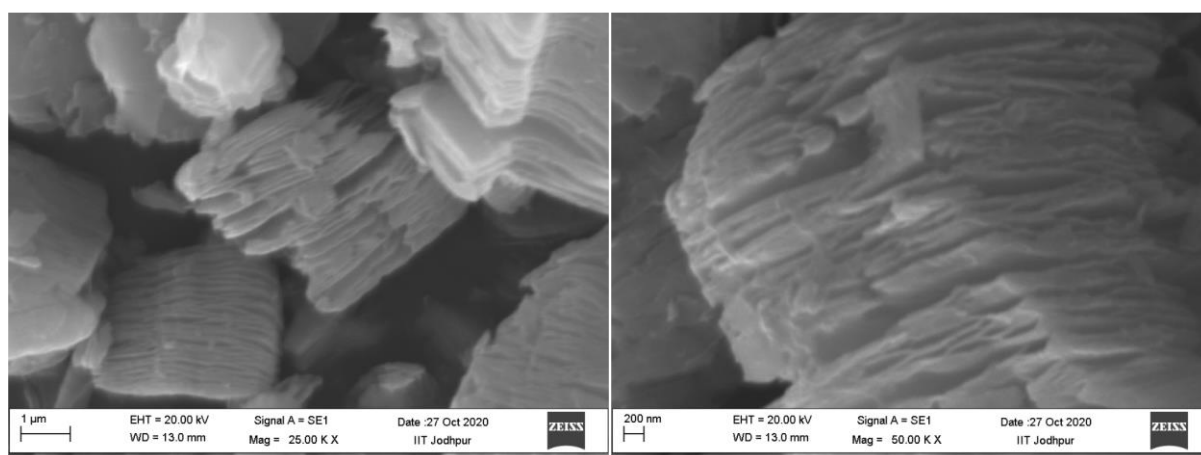

Figure S1: High magnification SEM images of MXene catalyst at  $1\mu\text{m}$  and  $200\text{nm}$ .

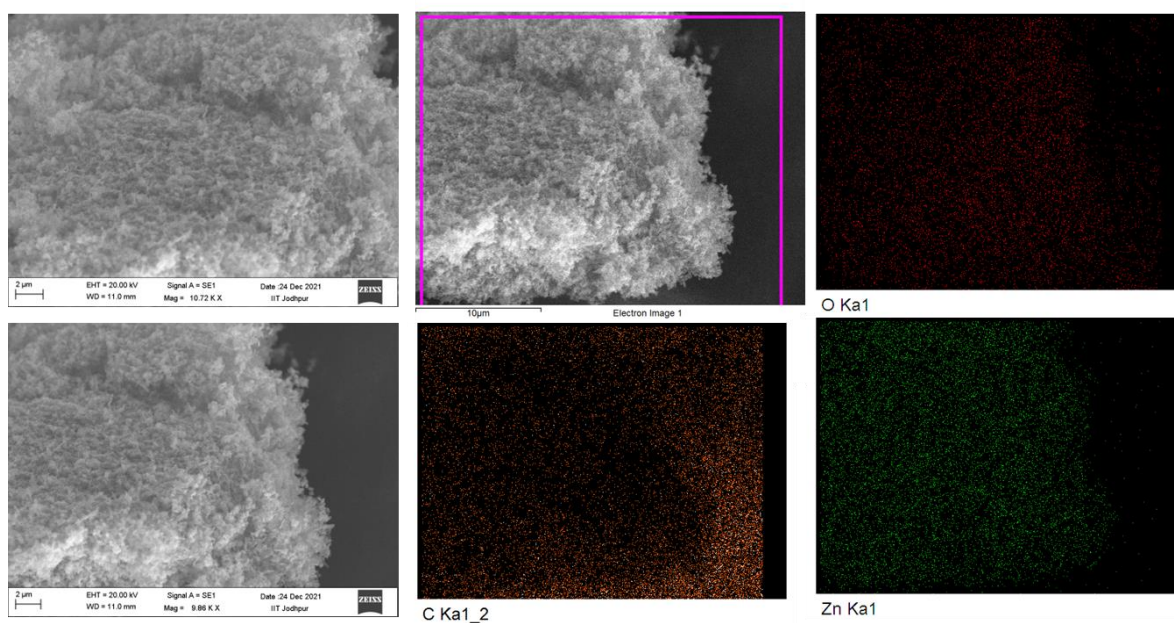

Figure S2: SEM image and EDX elemental mapping of ZnO nanoflakes.

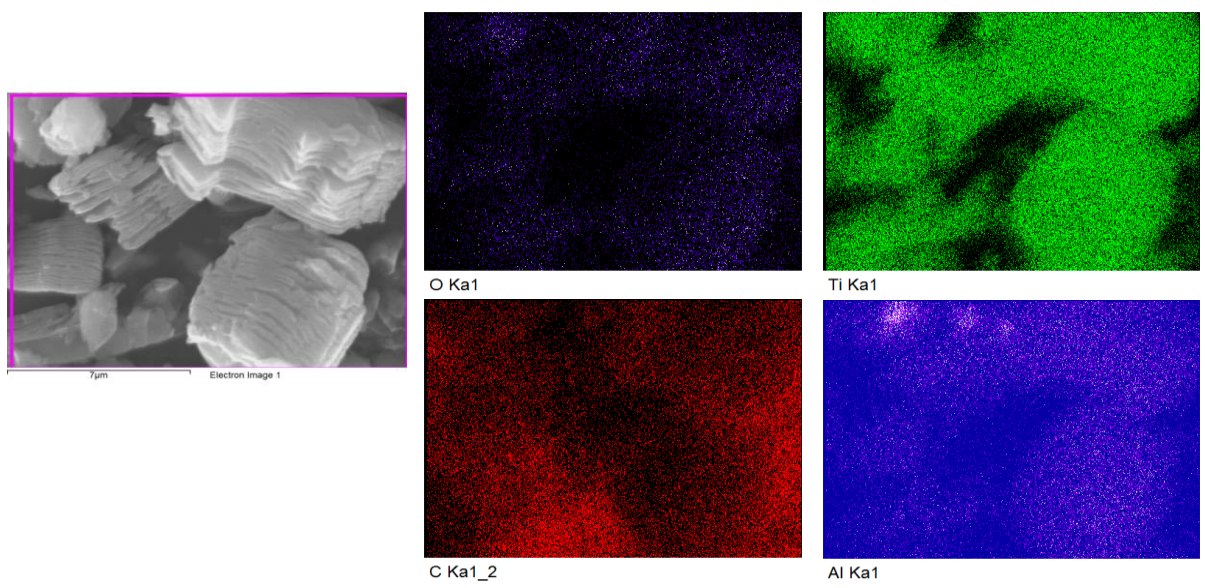

**Figure S3:** SEM image and EDX elemental mapping of  $\text{Ti}_3\text{C}_2\text{T}_x$ .

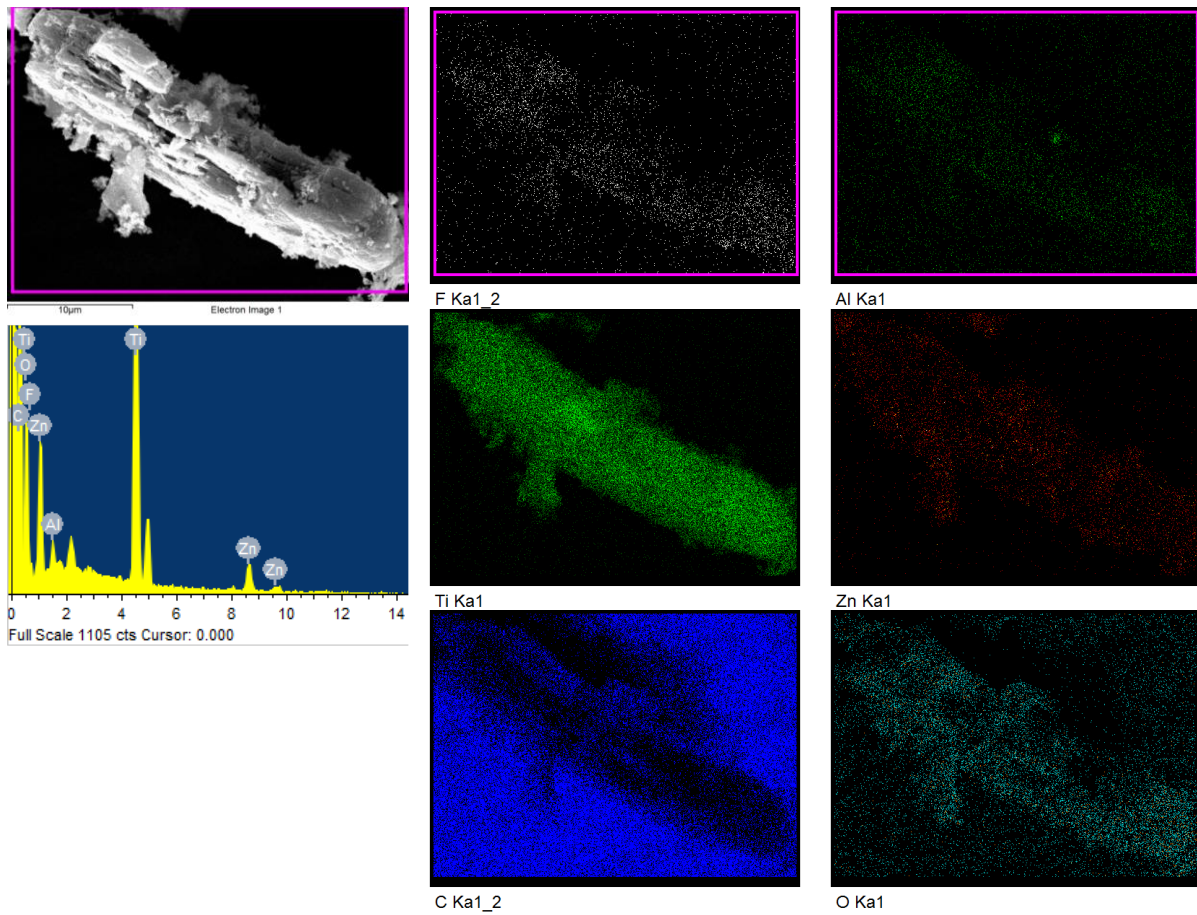

**Figure S4:** SEM image and EDX elemental mapping of ZnO-Ti<sub>3</sub>C<sub>2</sub>T<sub>x</sub> (15 wt%).

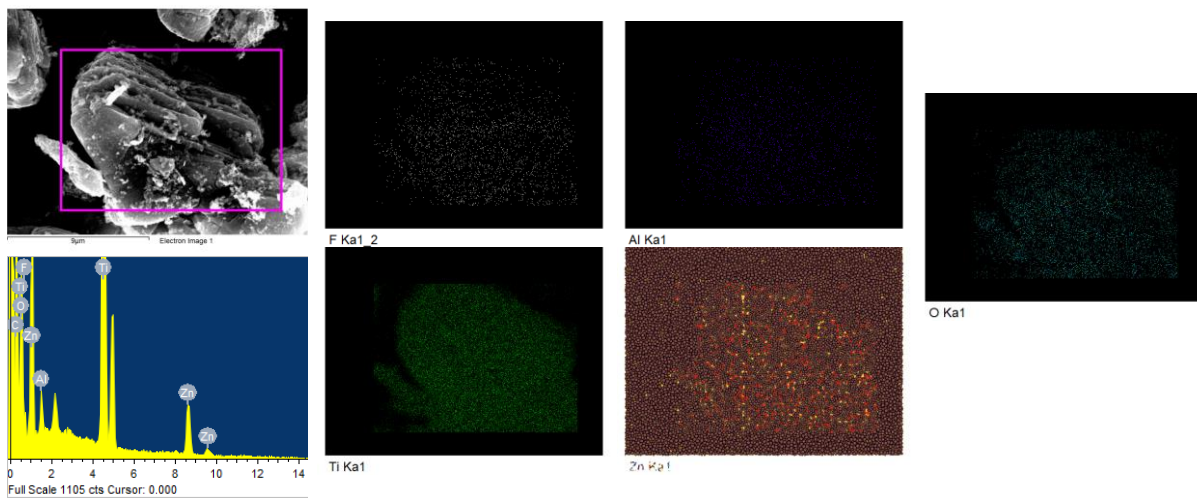

**Figure S5:** SEM image and EDX elemental mapping of ZnO-Ti<sub>3</sub>C<sub>2</sub>T<sub>x</sub> (10 wt%).

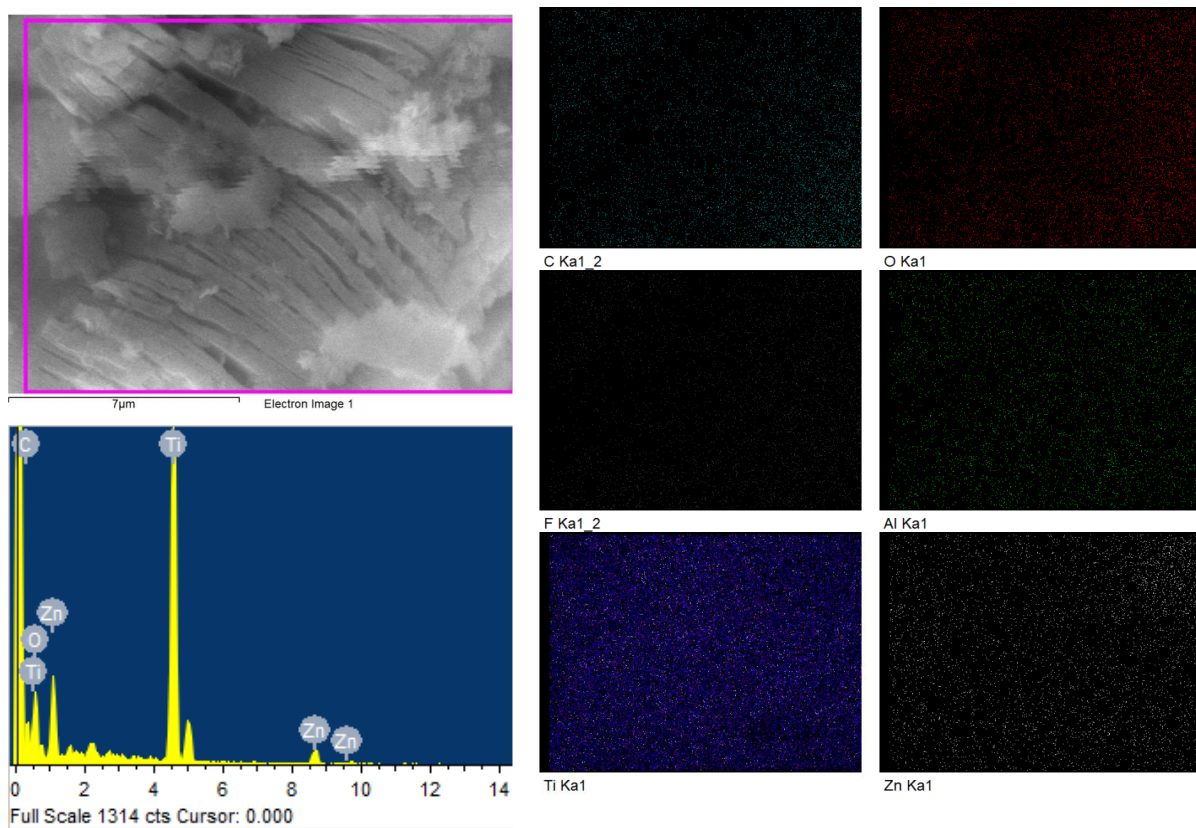

**Figure S6:** SEM image and EDX elemental mapping of ZnO-Ti<sub>3</sub>C<sub>2</sub>T<sub>x</sub> (5 wt%)

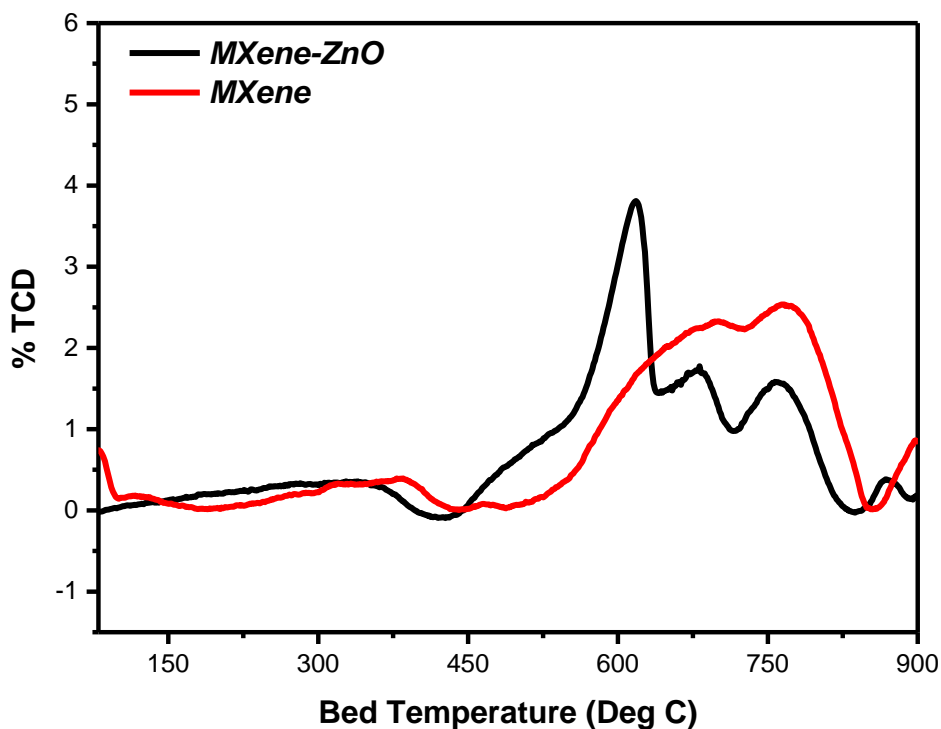

Figure S7:  $\text{NH}_3$  TPD spectra of  $\text{Ti}_3\text{C}_2\text{T}_x$ , and  $\text{ZnO-Ti}_3\text{C}_2\text{T}_x$  nanocomposite.

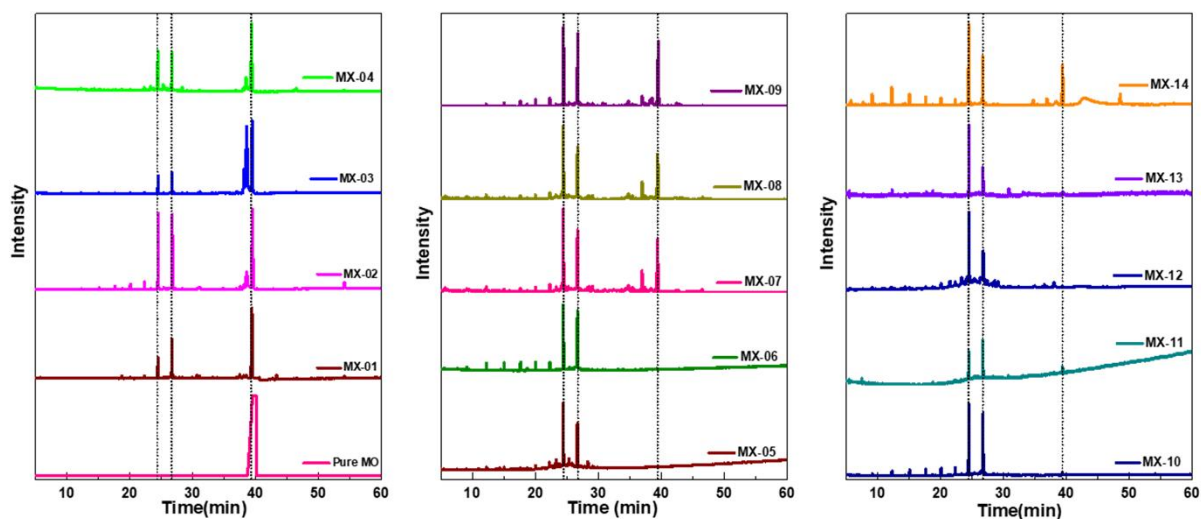

Figure S8. GC chromatogram of pure methyl oleate and for biodiesel product over  $\text{Ti}_3\text{C}_2\text{T}_x$  catalyst, (a) pure methyl oleate and from MX-01 to MX-04, (b) MX-05 to MX-09, and (c) MX-10 to MX-14.

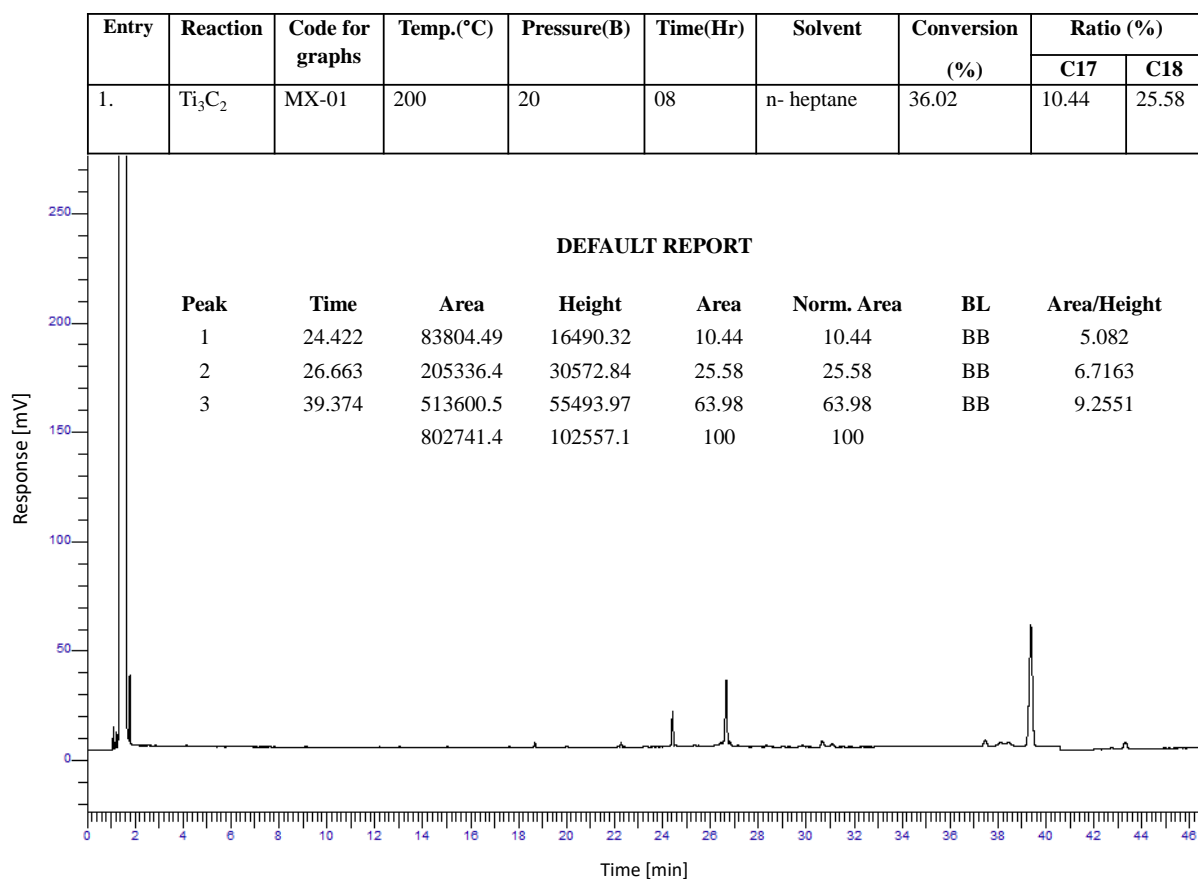

Figure S9: GC chromatogram for biodiesel product over Ti<sub>3</sub>C<sub>2</sub>T<sub>x</sub> catalyst (MX-01).

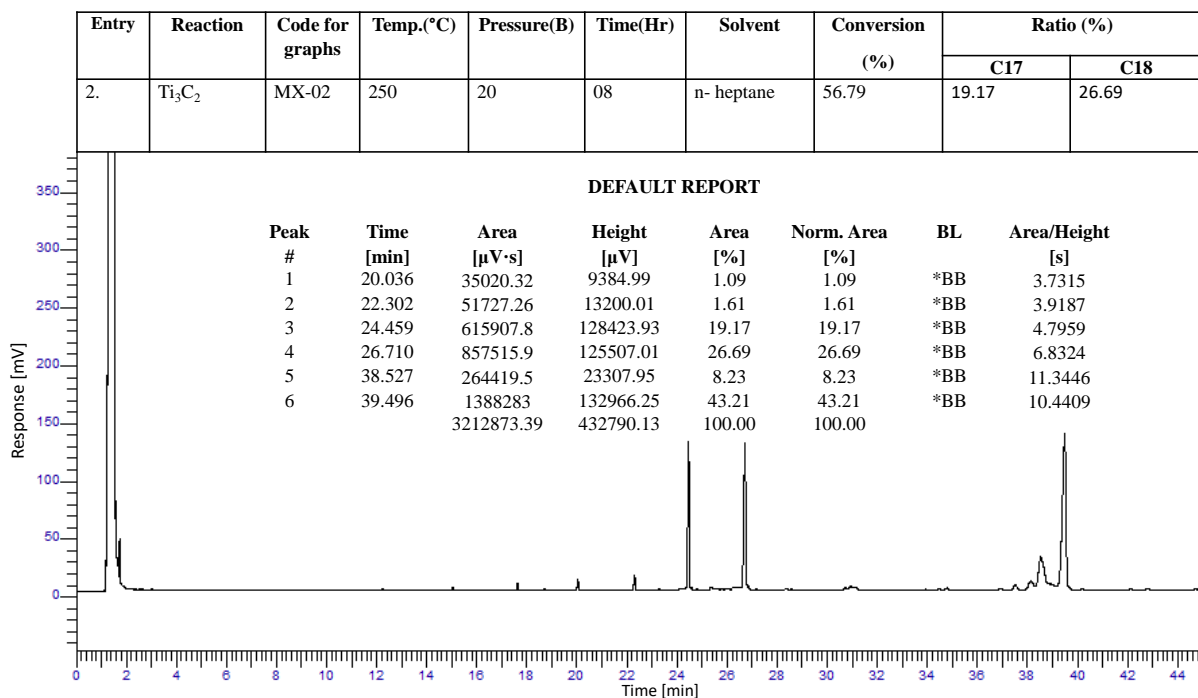

Figure S10: GC chromatogram for biodiesel product over Ti<sub>3</sub>C<sub>2</sub>T<sub>x</sub> catalyst (MX-02).

| Entry | Reaction                       | Code for graphs | Temp.(°C) | Pressure(B) | Time(Hr) | Solvent    | Conversion (%) | Ratio (%) |      |
|-------|--------------------------------|-----------------|-----------|-------------|----------|------------|----------------|-----------|------|
|       |                                |                 |           |             |          |            |                | C17       | C18  |
| 3.    | Ti <sub>3</sub> C <sub>2</sub> | MX-03           | 250       | 30          | 08       | n- heptane | 58.76          | 6.23      | 7.12 |

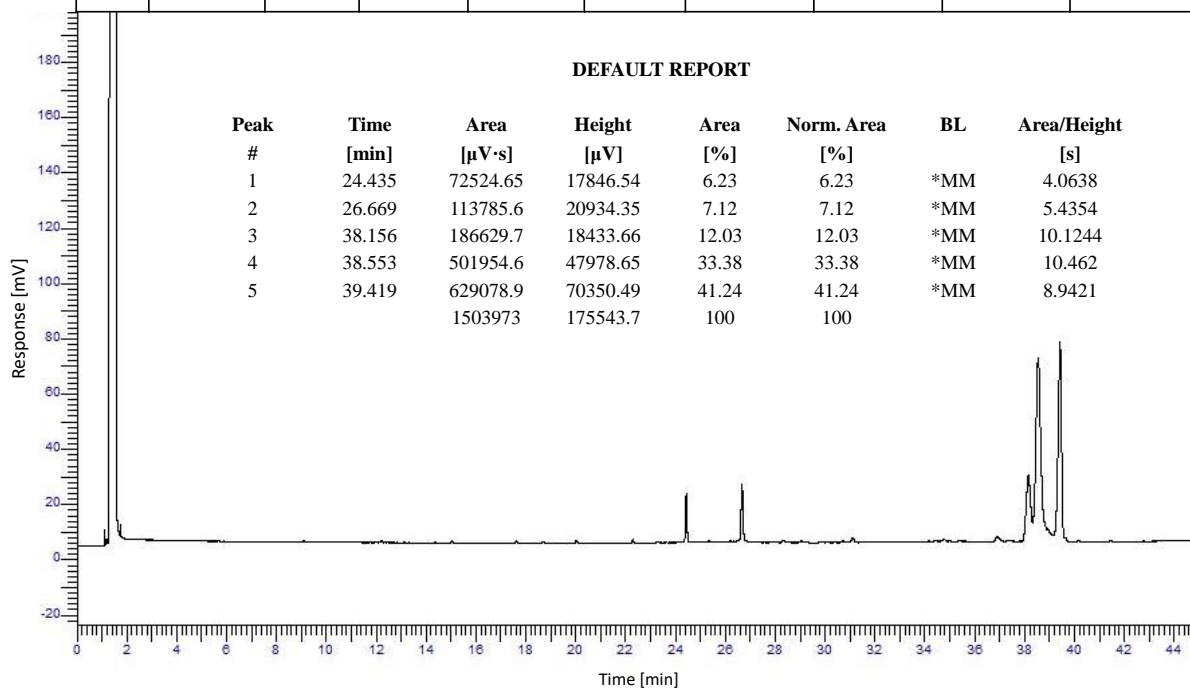

**Figure S11:** GC chromatogram for biodiesel product over Ti<sub>3</sub>C<sub>2</sub>T<sub>x</sub> catalyst (MX-03).

| Entry | Reaction                       | Code for graphs | Temp.(°C) | Pressure(B) | Time(Hr) | Solvent    | Conversion (%) | Ratio (%) |       |
|-------|--------------------------------|-----------------|-----------|-------------|----------|------------|----------------|-----------|-------|
|       |                                |                 |           |             |          |            |                | C17       | C18   |
| 4.    | Ti <sub>3</sub> C <sub>2</sub> | MX-04           | 280       | 30          | 08       | n- heptane | 63.77          | 23.57     | 24.19 |

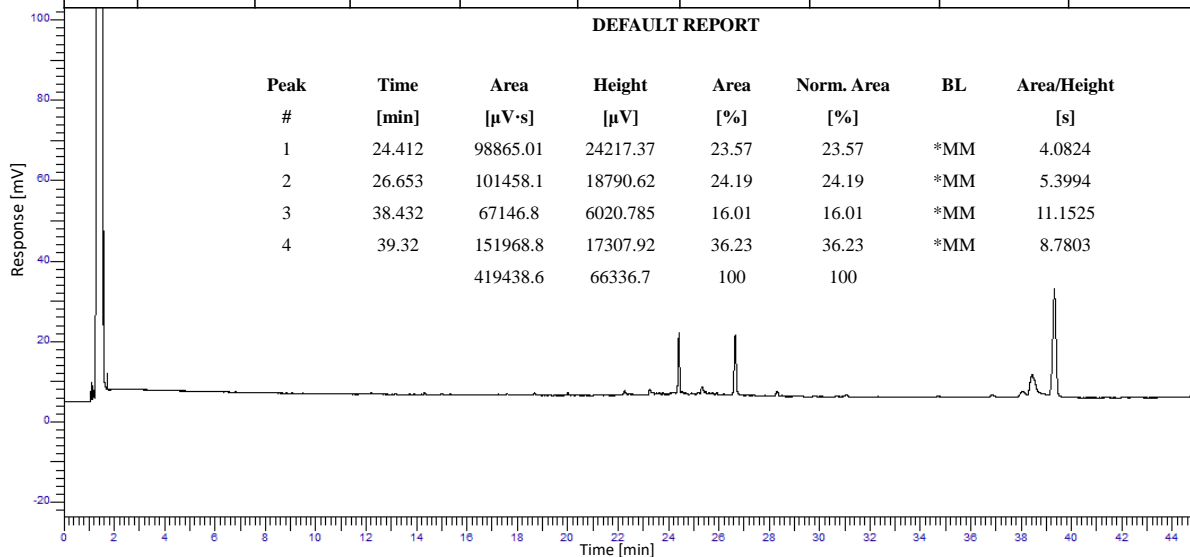

**Figure S12:** GC chromatogram for biodiesel product over Ti<sub>3</sub>C<sub>2</sub>T<sub>x</sub> catalyst (MX-04).



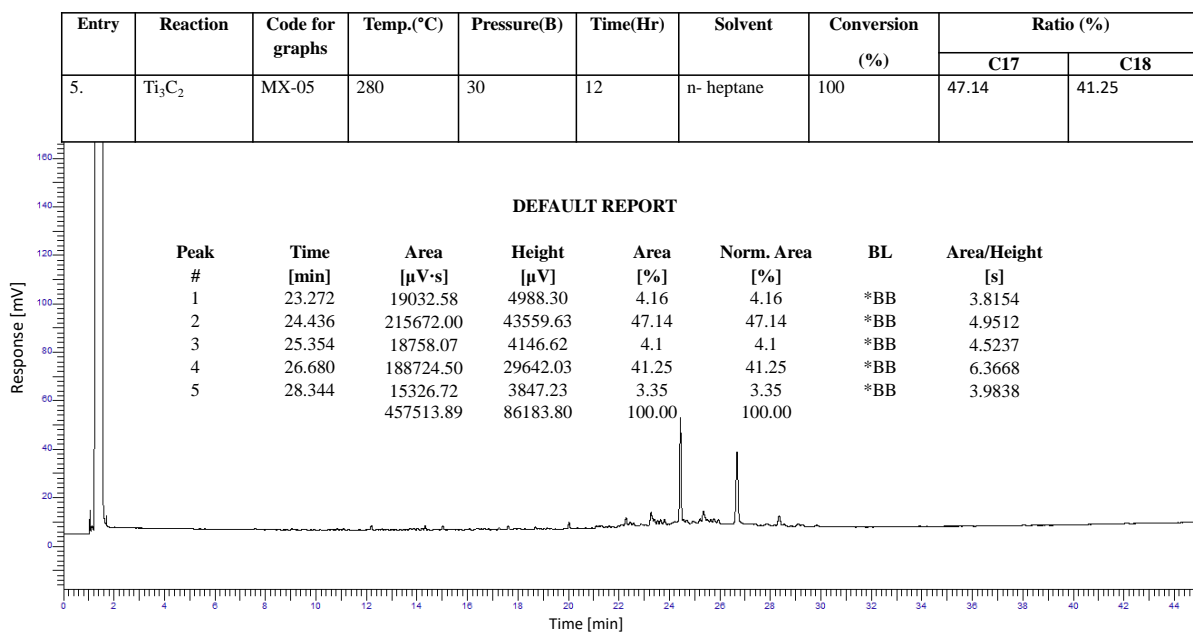

Figure S13: GC chromatogram for biodiesel product over Ti<sub>3</sub>C<sub>2</sub>T<sub>x</sub> catalyst (MX-05).

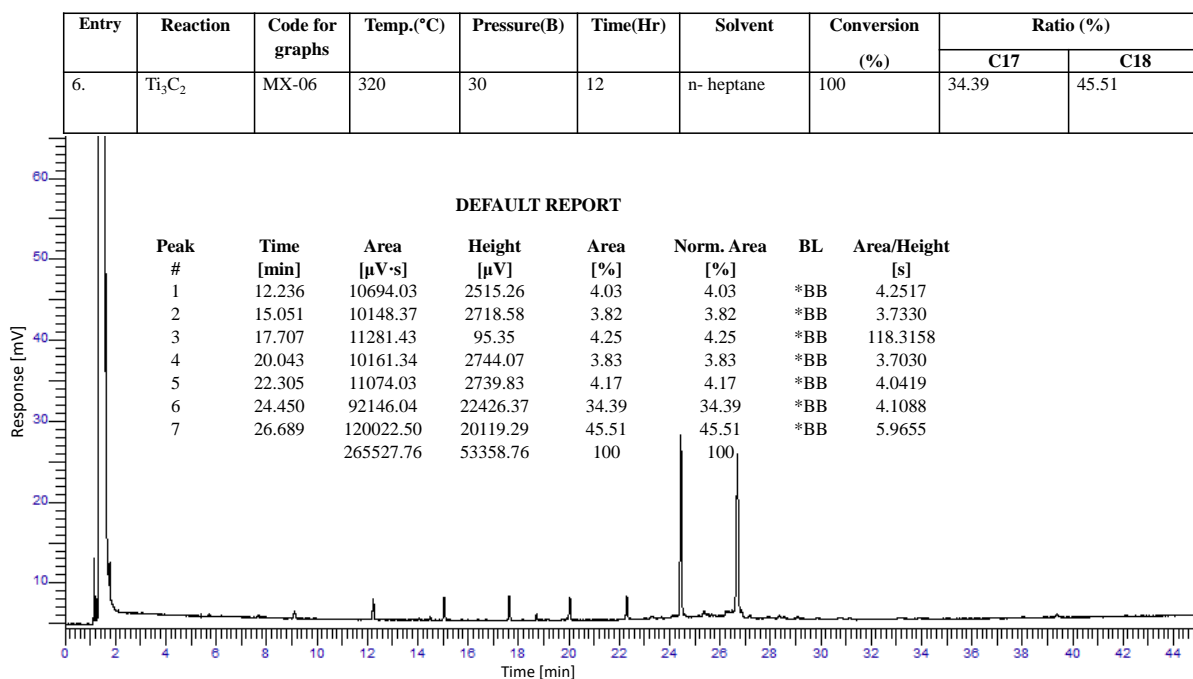

Figure S14: GC chromatogram for biodiesel product over Ti<sub>3</sub>C<sub>2</sub>T<sub>x</sub> catalyst (MX-06).

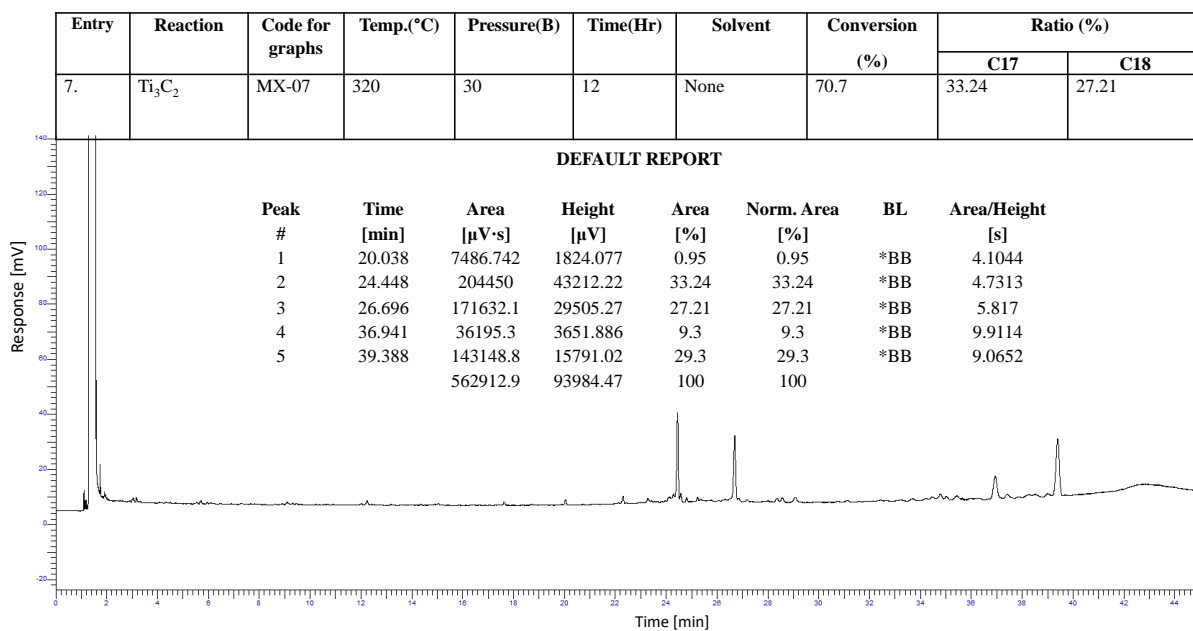

**Figure S15:** GC chromatogram for biodiesel product over Ti<sub>3</sub>C<sub>2</sub>T<sub>x</sub> catalyst (MX-07).

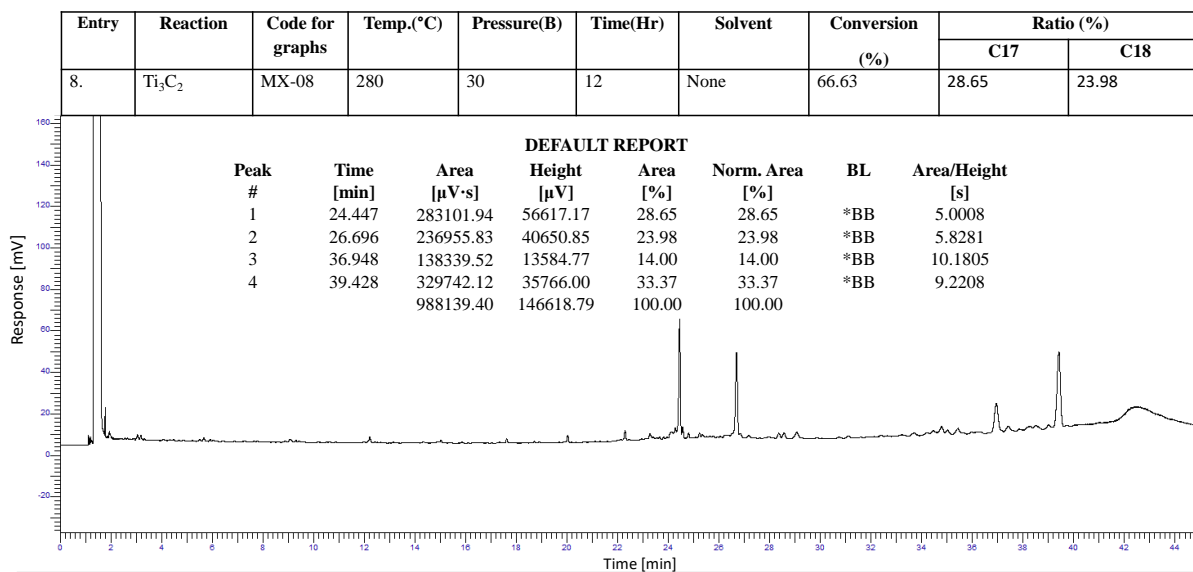

**Figure S16:** GC chromatogram for biodiesel product over Ti<sub>3</sub>C<sub>2</sub>T<sub>x</sub> catalyst (MX-08).

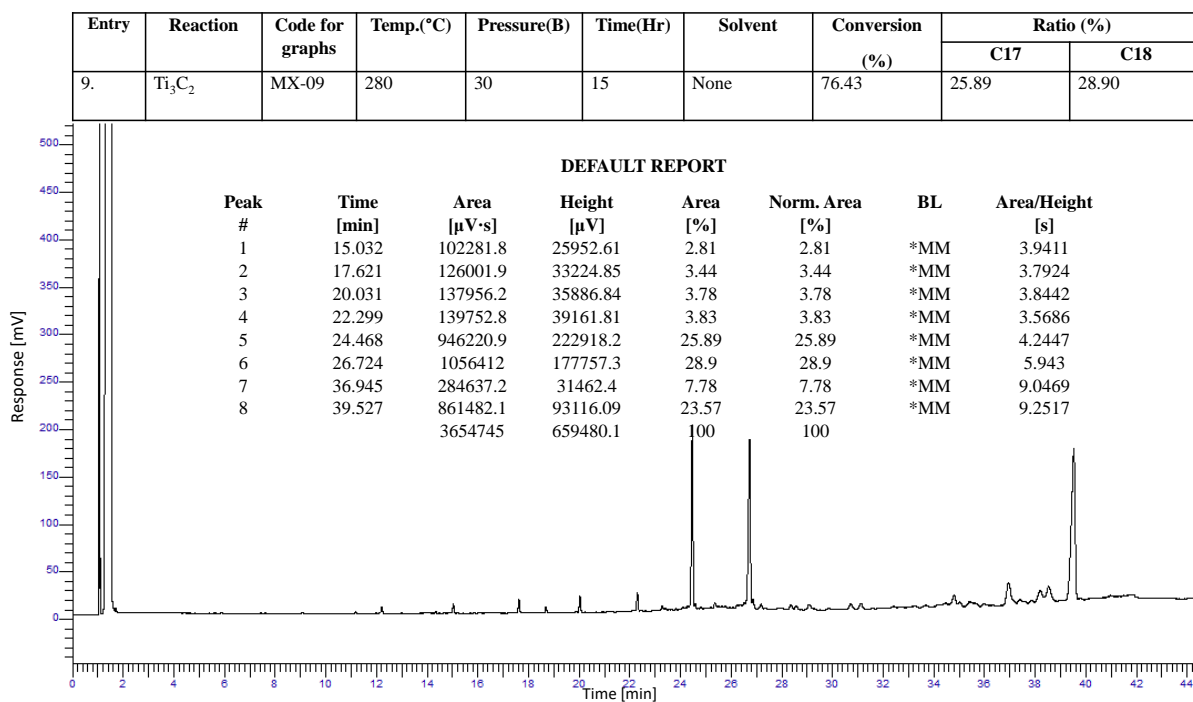

Figure S17: GC chromatogram for biodiesel product over Ti<sub>3</sub>C<sub>2</sub>T<sub>x</sub> catalyst (MX-09).

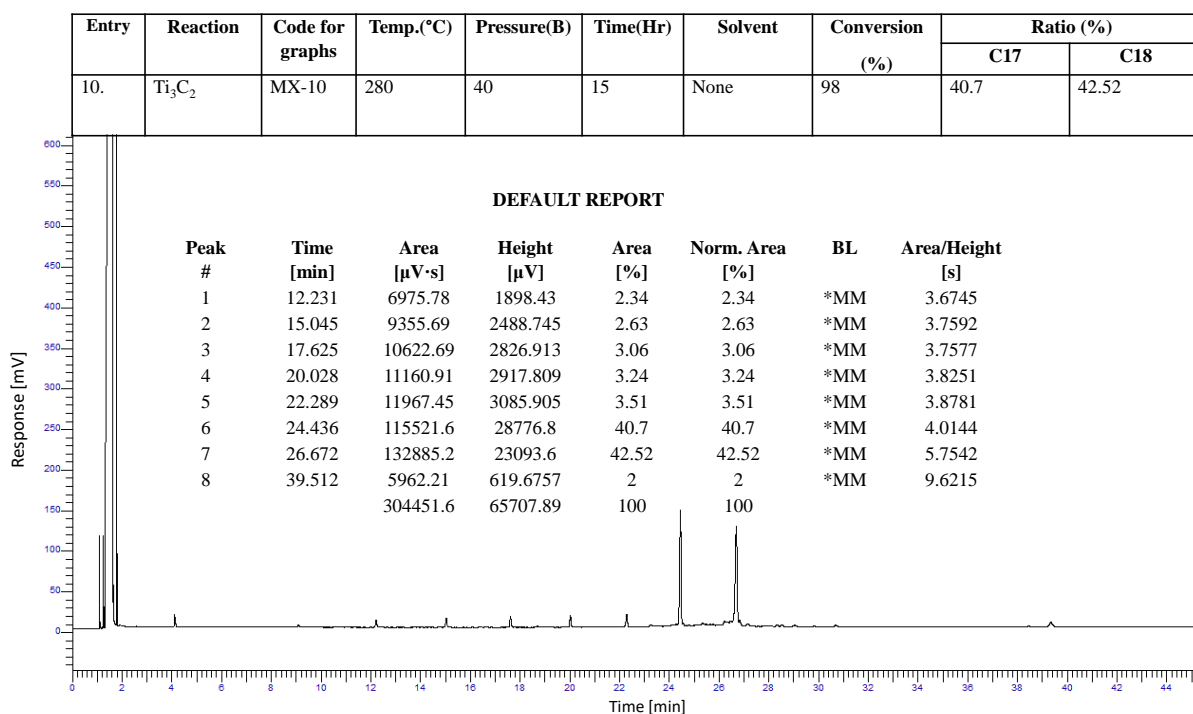

Figure S18: GC chromatogram for biodiesel product over Ti<sub>3</sub>C<sub>2</sub>T<sub>x</sub> catalyst (MX-10).

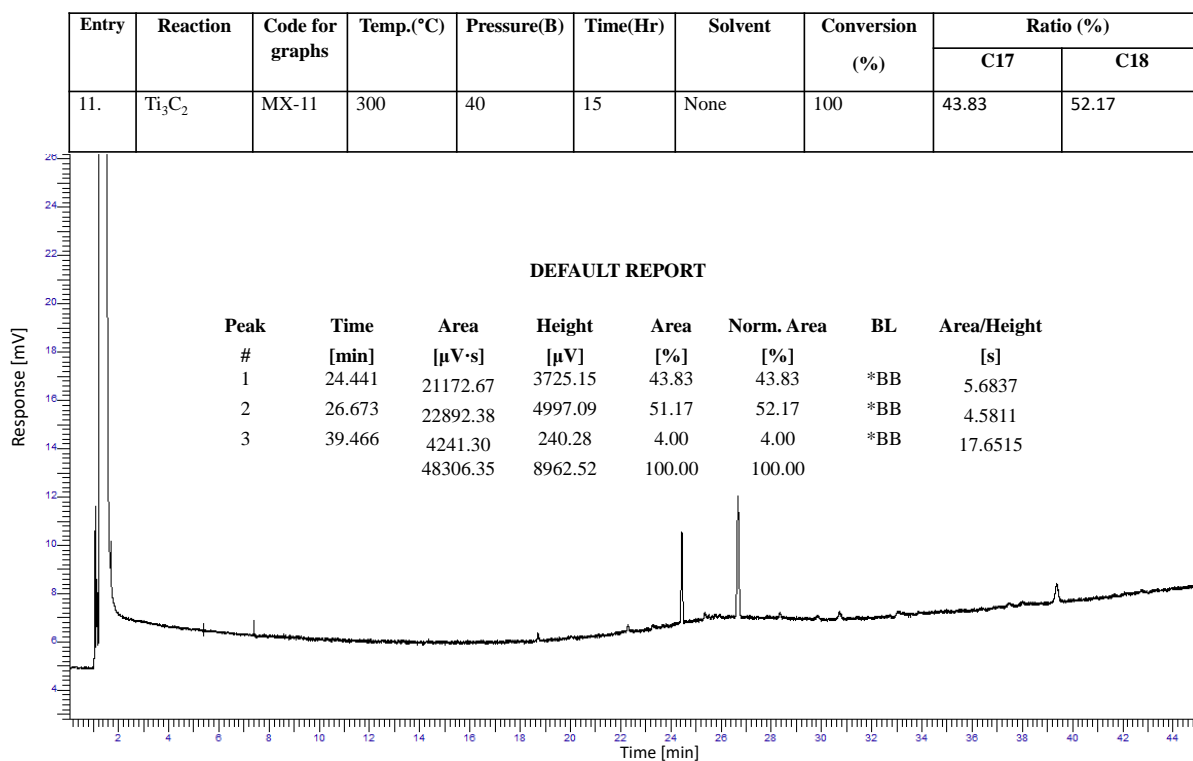

Figure S19: GC chromatogram for biodiesel product over Ti<sub>3</sub>C<sub>2</sub>T<sub>x</sub> catalyst (MX-11).

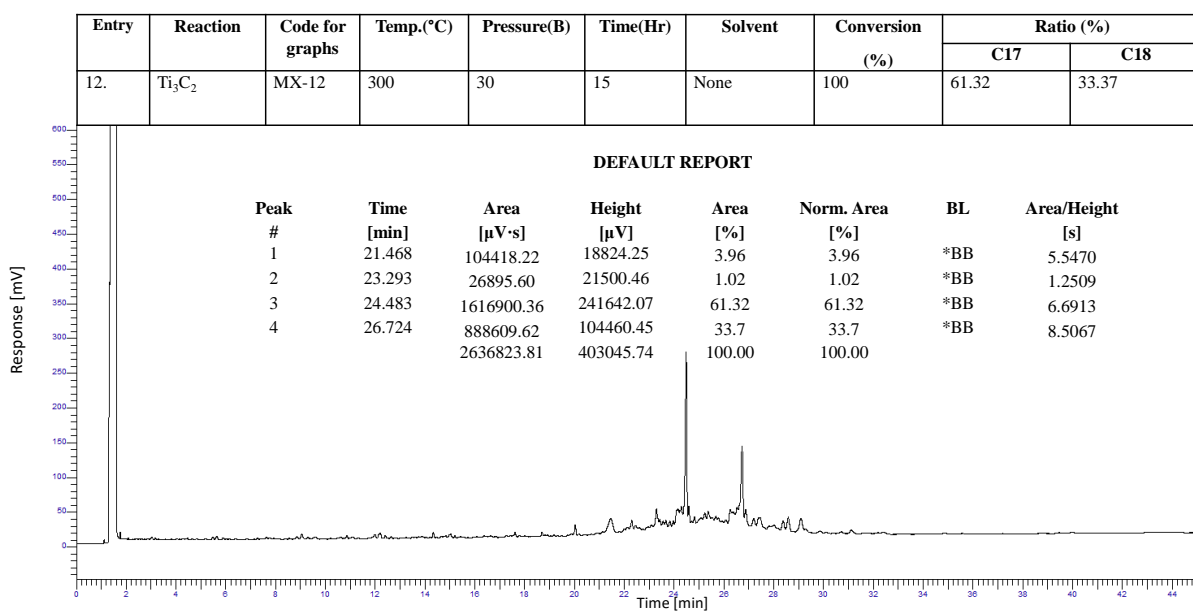

Figure S20: GC chromatogram for biodiesel product over Ti<sub>3</sub>C<sub>2</sub>T<sub>x</sub> catalyst (MX-12).

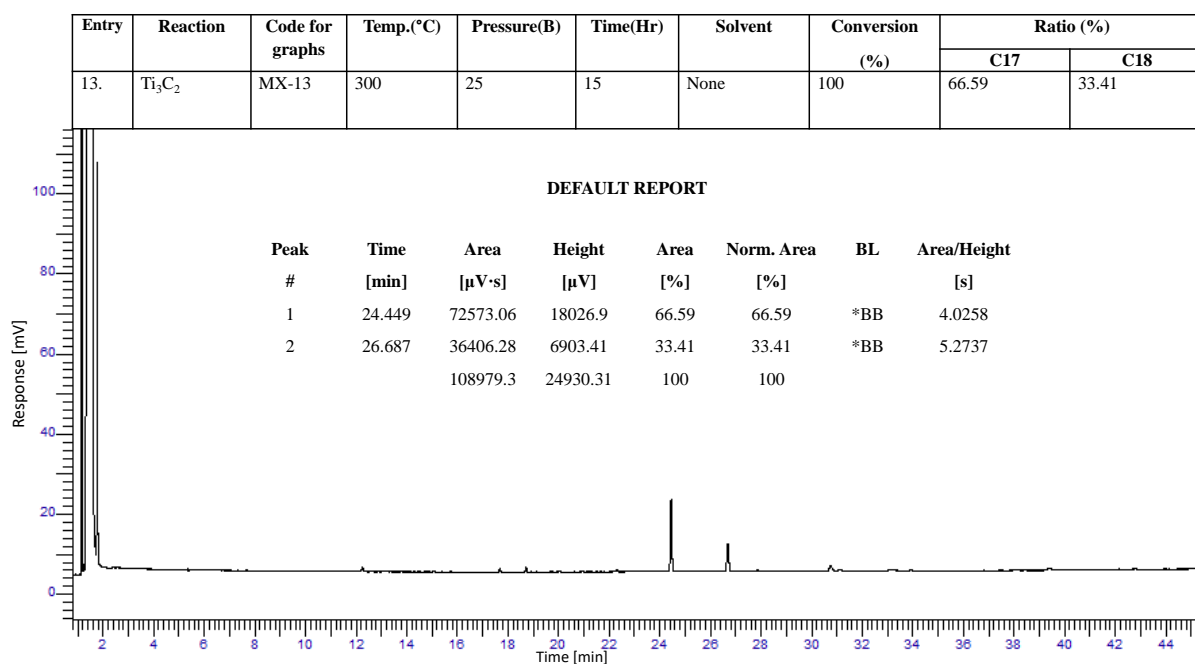

Figure S21: GC chromatogram for biodiesel product over Ti<sub>3</sub>C<sub>2</sub>T<sub>x</sub> catalyst (MX-13).

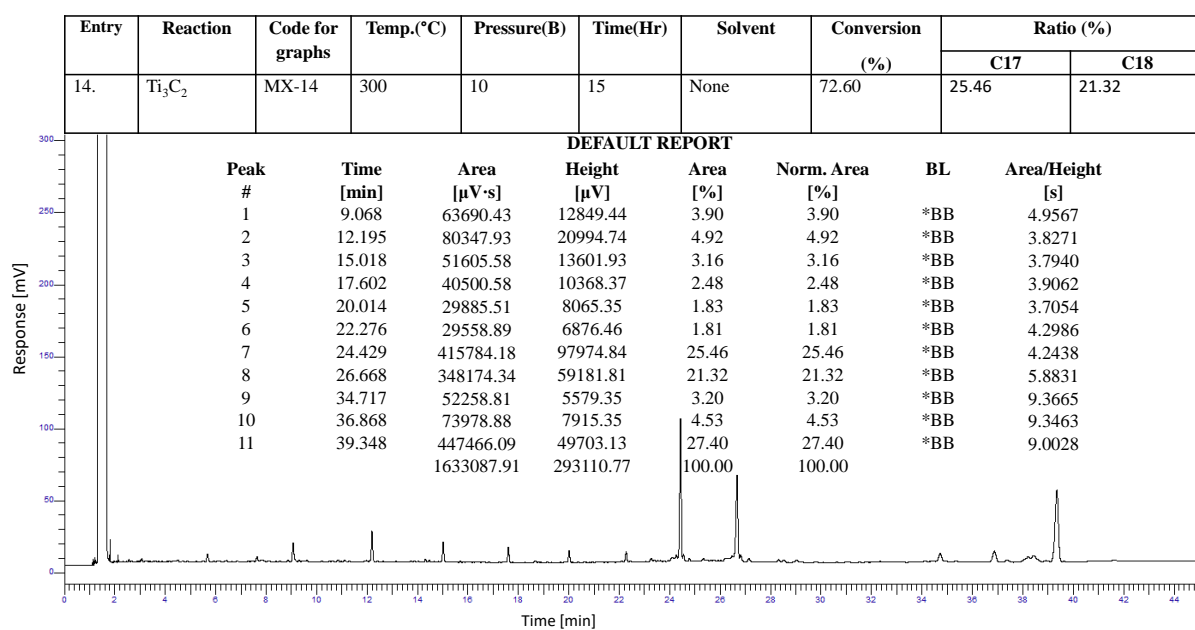

Figure S22: GC chromatogram for biodiesel product over Ti<sub>3</sub>C<sub>2</sub>T<sub>x</sub> catalyst (MX-14).

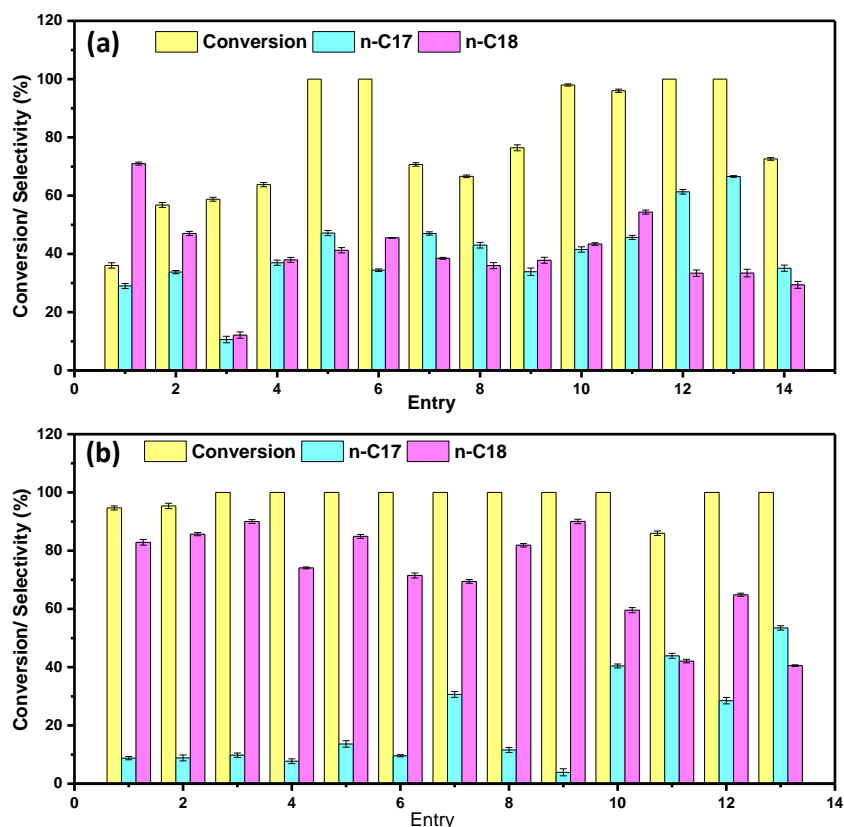

**Figure S23:** Conversion and selectivity of the methyl oleate using (a) MXene and (b) ZnO-MXene catalysts. The error bar representing the relative deviation is within 1.5%.

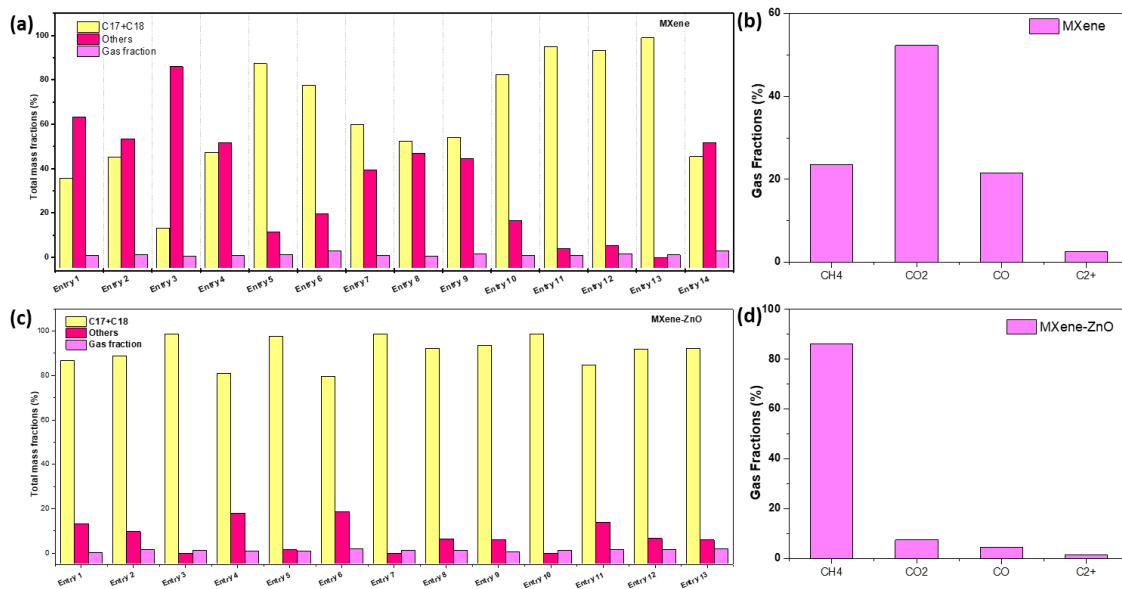

**Figure S24:** (a&c) The carbon balance for MXene and MXene-ZnO; (b) gas compositions using MXene catalyst (entry 13) and MXene-ZnO catalyst (entry 9).

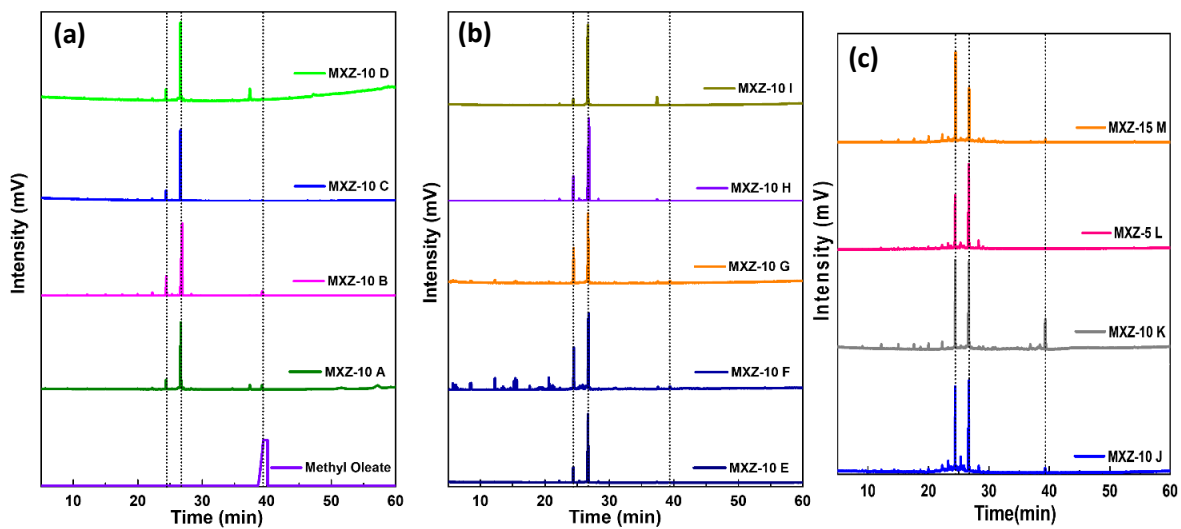

**Figure 25.** GC chromatogram of pure methyl oleate and for biodiesel product over ZnO-Ti<sub>3</sub>C<sub>2</sub>T<sub>x</sub> catalyst; (a) Pure Methyl Oleate and MXZ-10 A to MXZ-10D, (b) reactions from MXZ-10 to MXZ-10I, (c) reactions from MXZ-10J to MXZ-15 M.

Step- I Hydrogenation of double bond

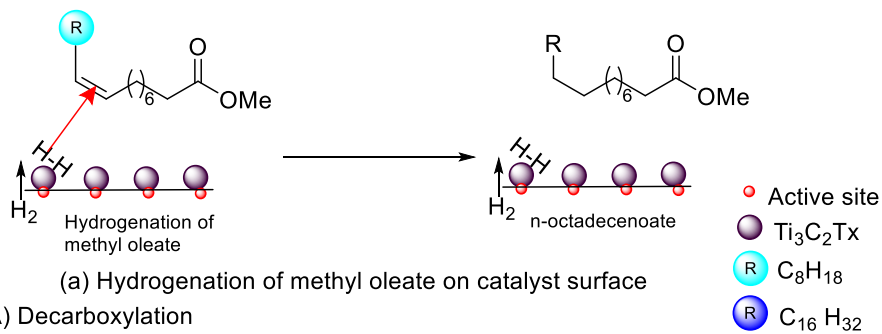

Step-II(A) Decarboxylation

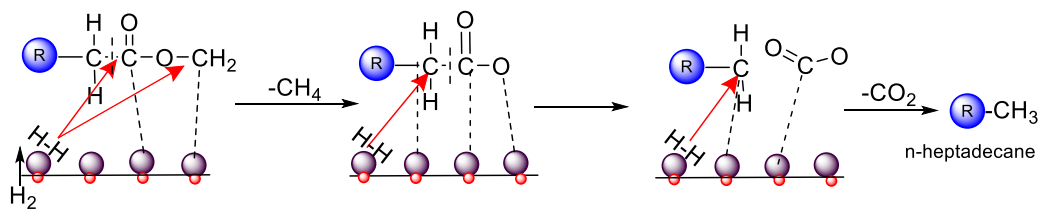

Step-II(A) Decarbonylation

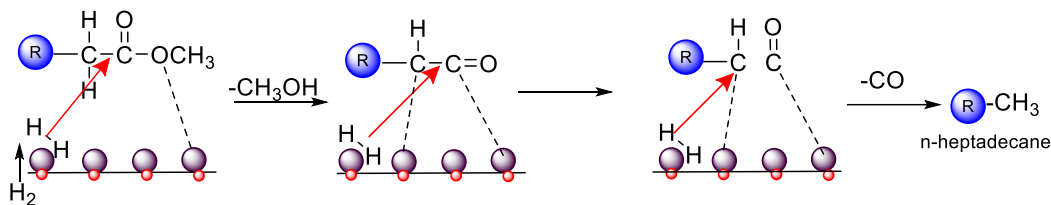

Step-II(B) Hydrodeoxygenation

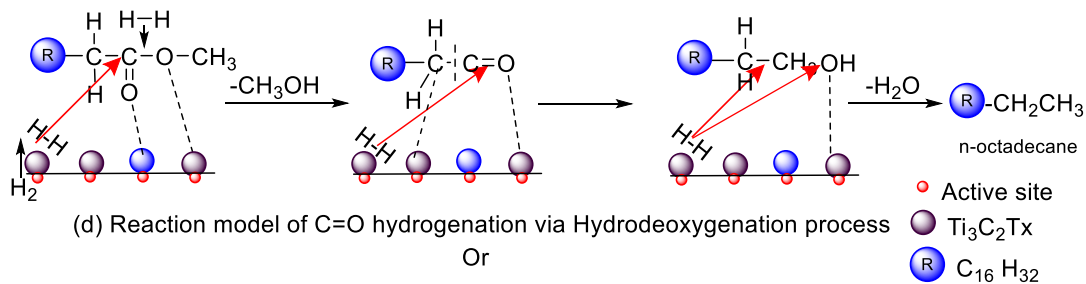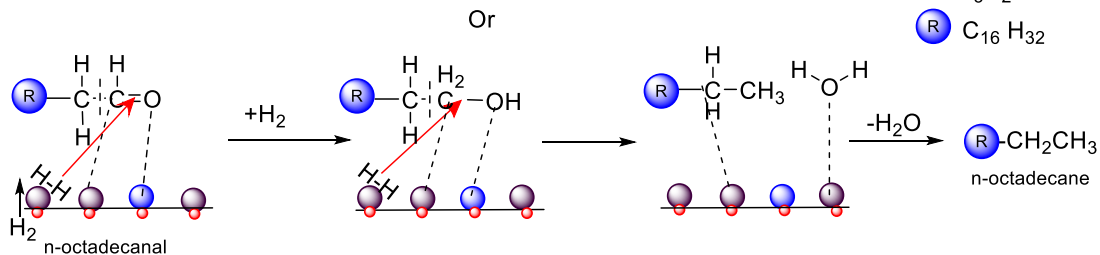

**Figure S26:** The possible reaction mechanism of selective hydrogenation of methyl oleate over MXene and MXene-ZnO.



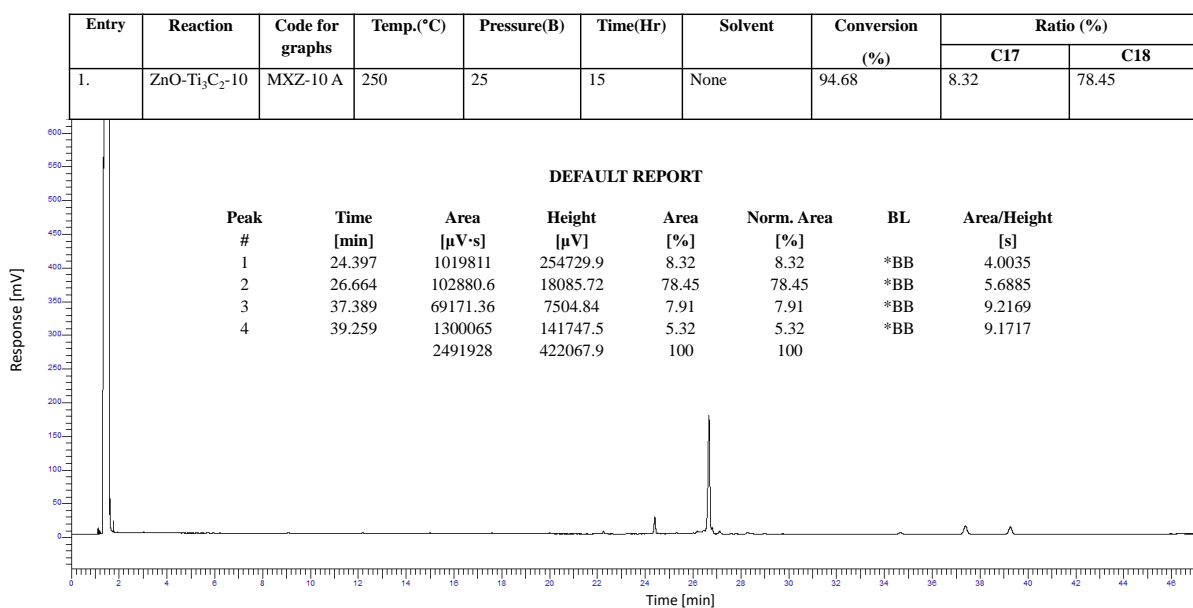

Figure S27: GC chromatogram for biodiesel product over ZnO-Ti<sub>3</sub>C<sub>2</sub>T<sub>x</sub> catalyst (MXZ-10 A).

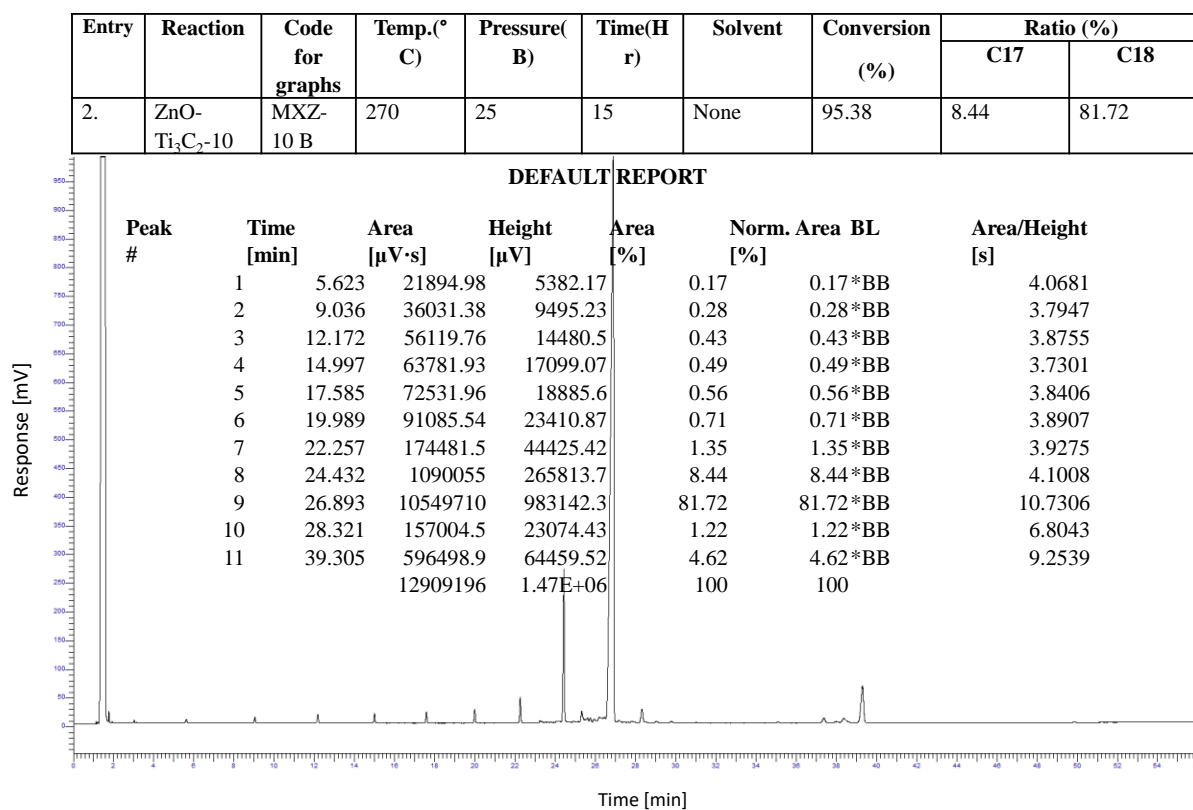

Figure S28: GC chromatogram for biodiesel product over ZnO-Ti<sub>3</sub>C<sub>2</sub>T<sub>x</sub> catalyst (MXZ-10 B).

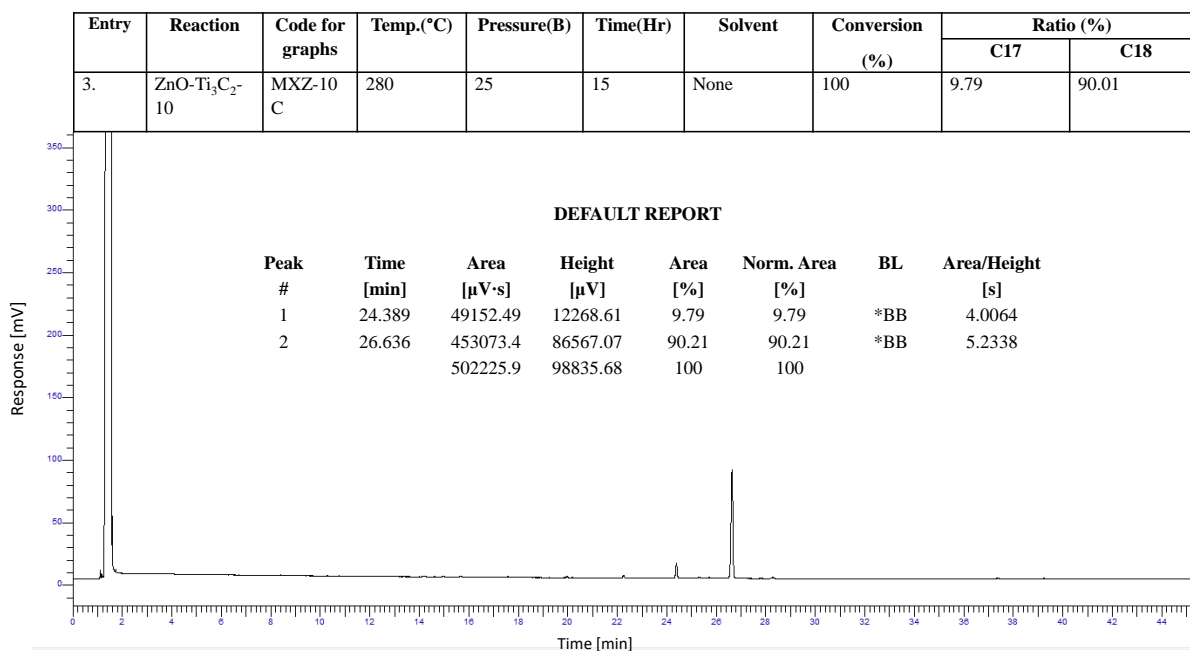

Figure S29: GC chromatogram for biodiesel product over ZnO-Ti<sub>3</sub>C<sub>2</sub>T<sub>x</sub> catalyst (MXZ-10 C).

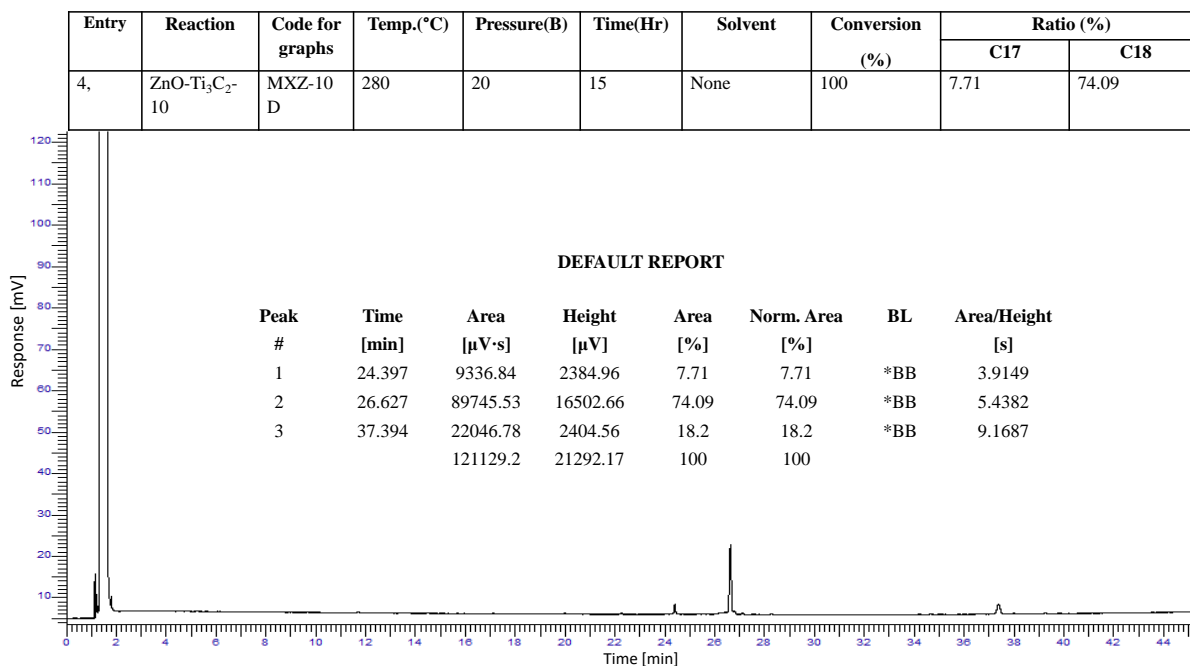

Figure S30: GC chromatogram for biodiesel product over ZnO-Ti<sub>3</sub>C<sub>2</sub>T<sub>x</sub> catalyst (MXZ-10 D).

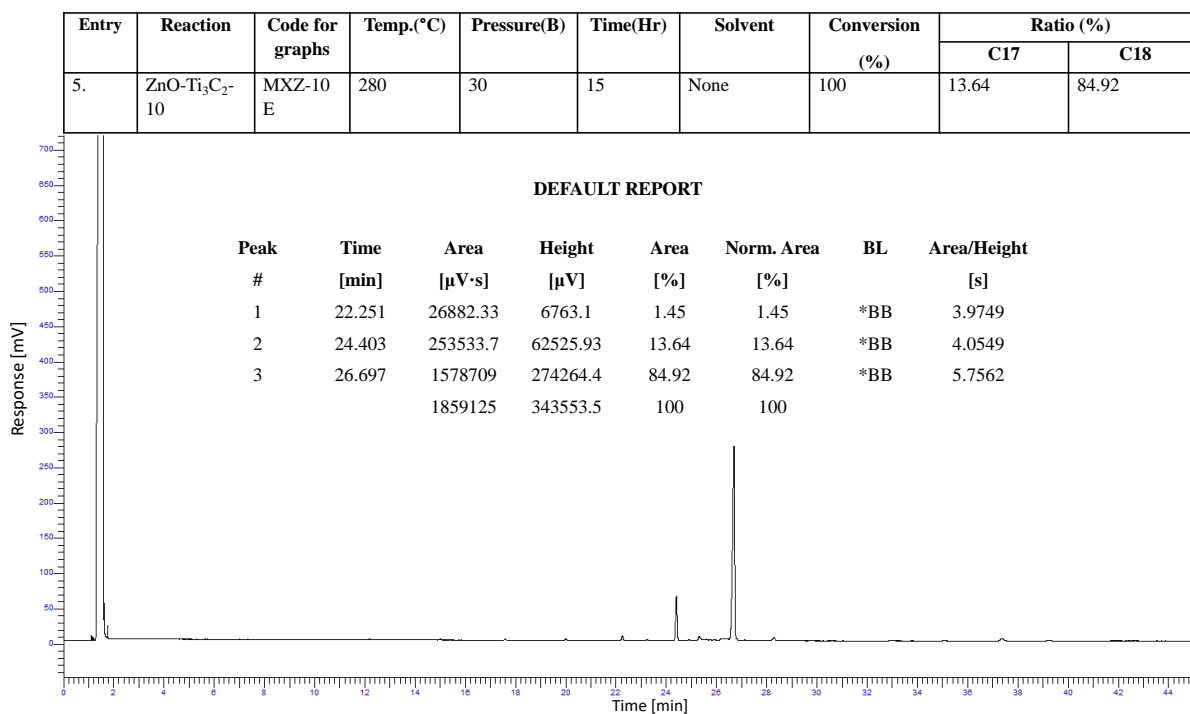

Figure S31: GC chromatogram for biodiesel product over ZnO-Ti<sub>3</sub>C<sub>2</sub>T<sub>x</sub> catalyst (MXZ-10 E).

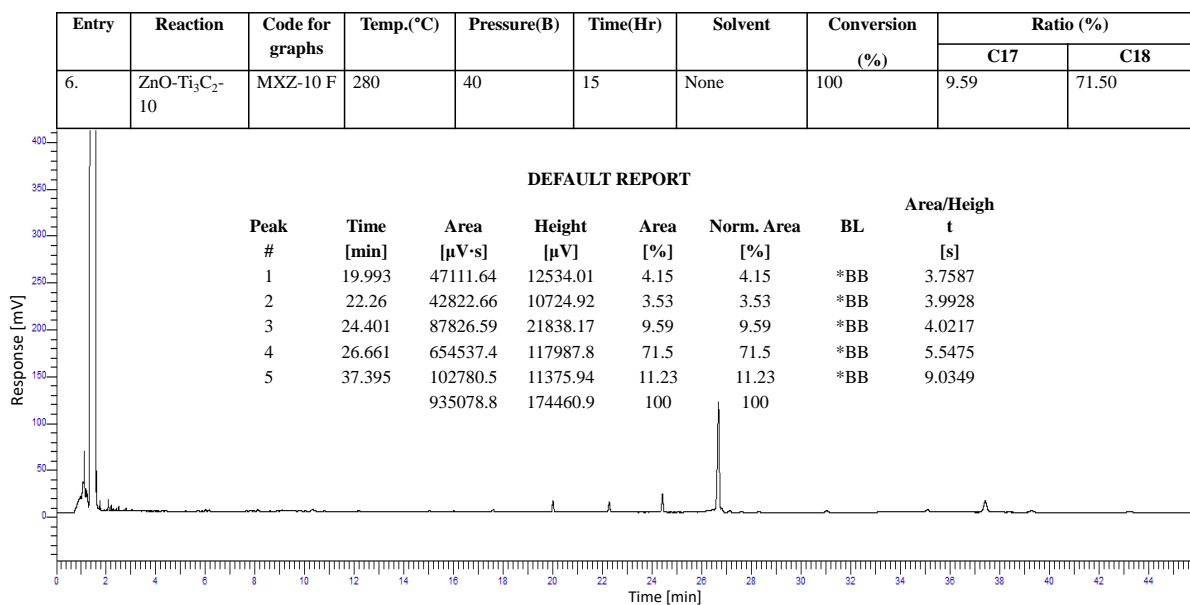

Figure S32: GC chromatogram for biodiesel product over ZnO-Ti<sub>3</sub>C<sub>2</sub>T<sub>x</sub> catalyst (MXZ-10 F).

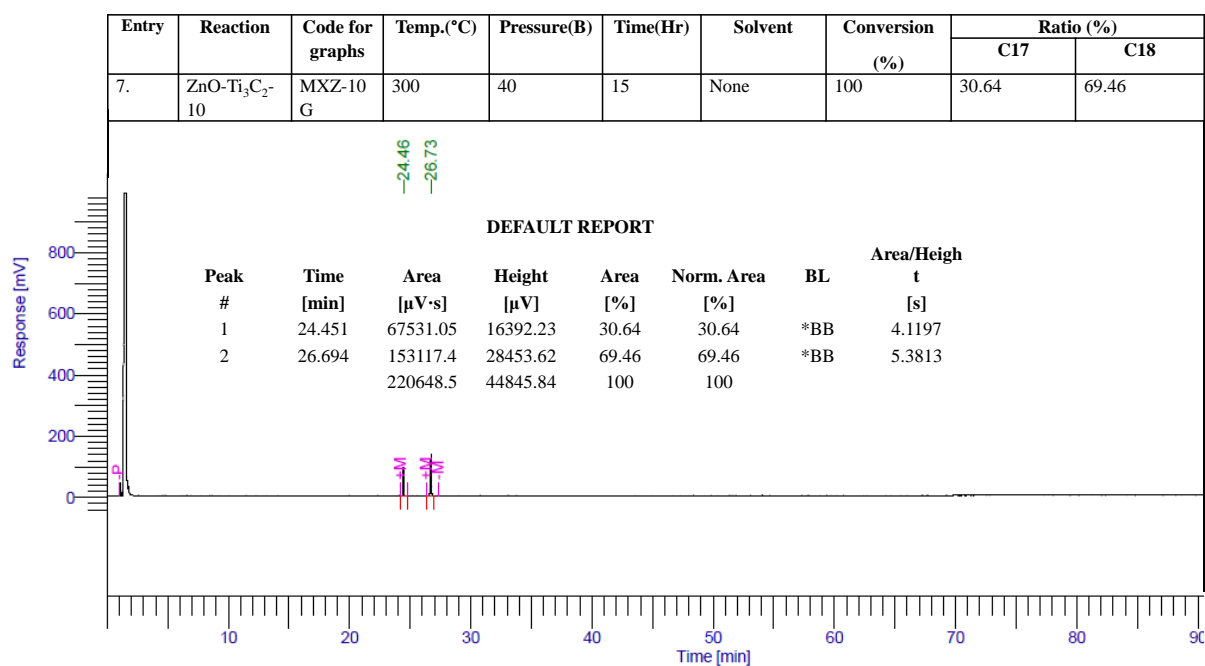

Figure S33: GC chromatogram for biodiesel product over ZnO-Ti<sub>3</sub>C<sub>2</sub>T<sub>x</sub> catalyst (MXZ-10 G).

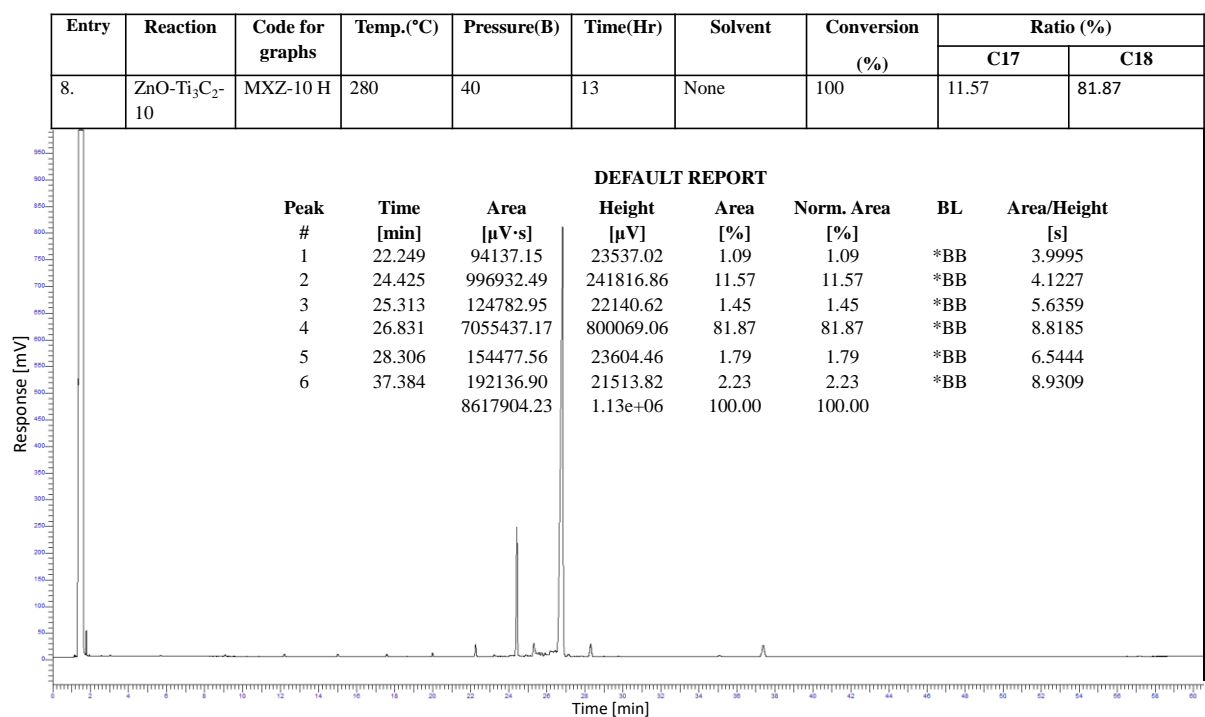

Figure S34: GC chromatogram for biodiesel product over ZnO-Ti<sub>3</sub>C<sub>2</sub>T<sub>x</sub> catalyst (MXZ-10 H).

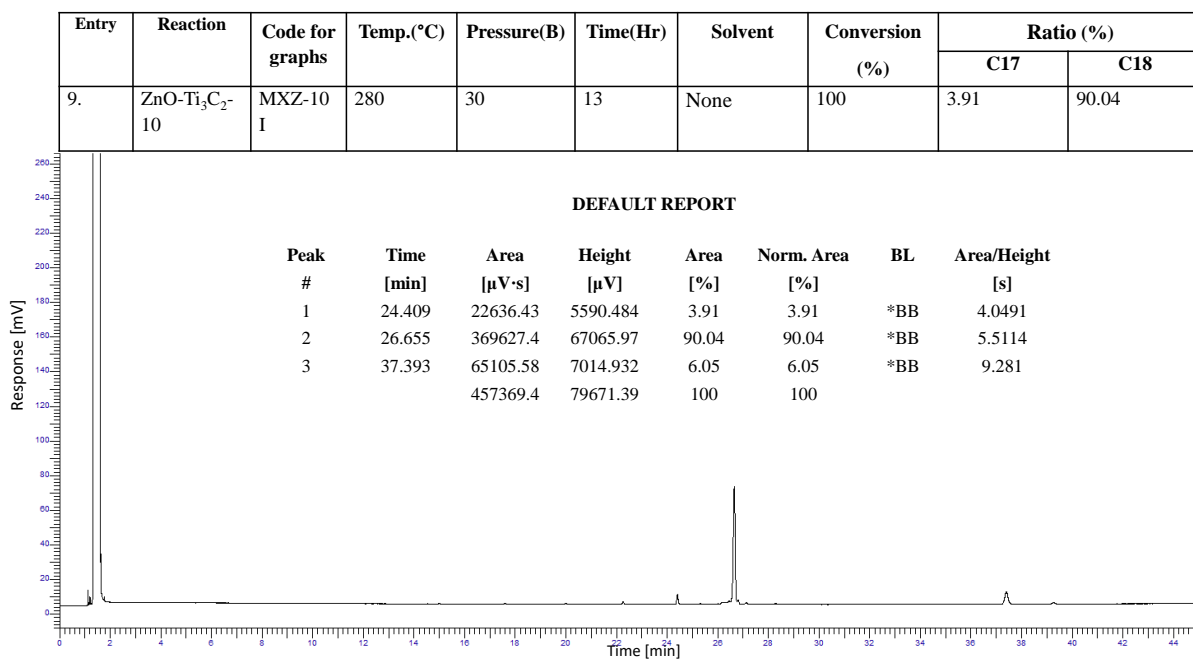

Figure S35: GC chromatogram for biodiesel product over ZnO-Ti<sub>3</sub>C<sub>2</sub>T<sub>x</sub> catalyst (MXZ-10 I).

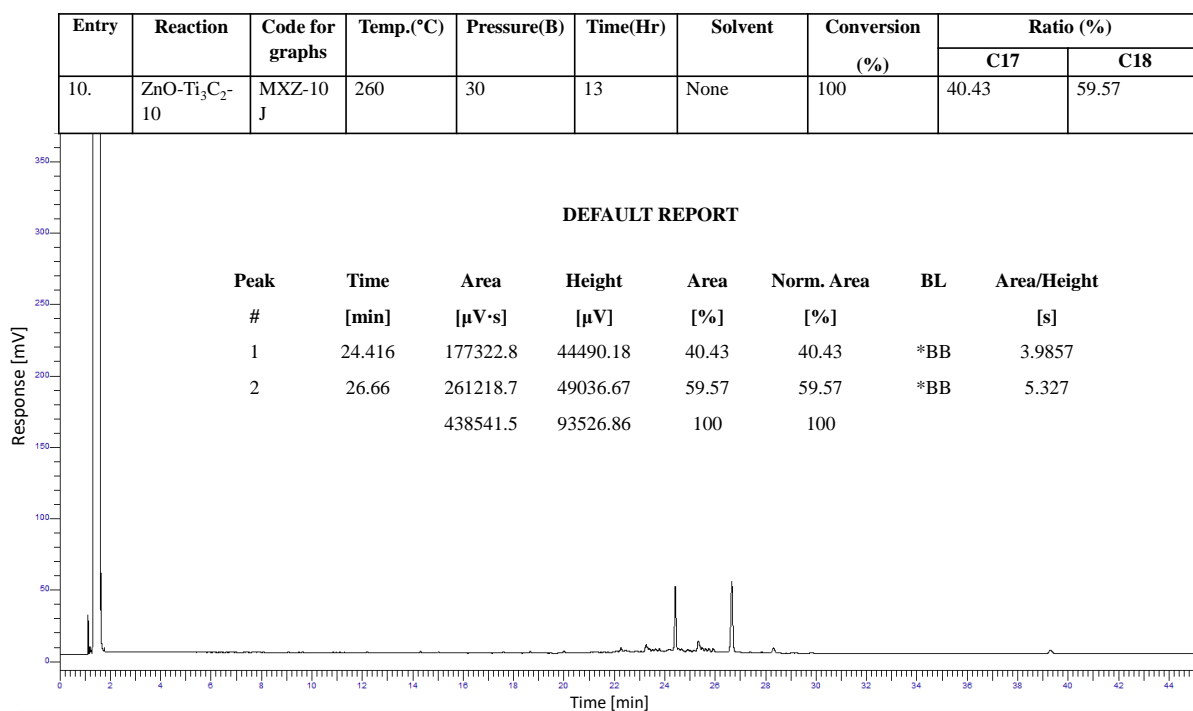

Figure S36: GC chromatogram for biodiesel product over ZnO-Ti<sub>3</sub>C<sub>2</sub>T<sub>x</sub> catalyst (MXZ-10 J).

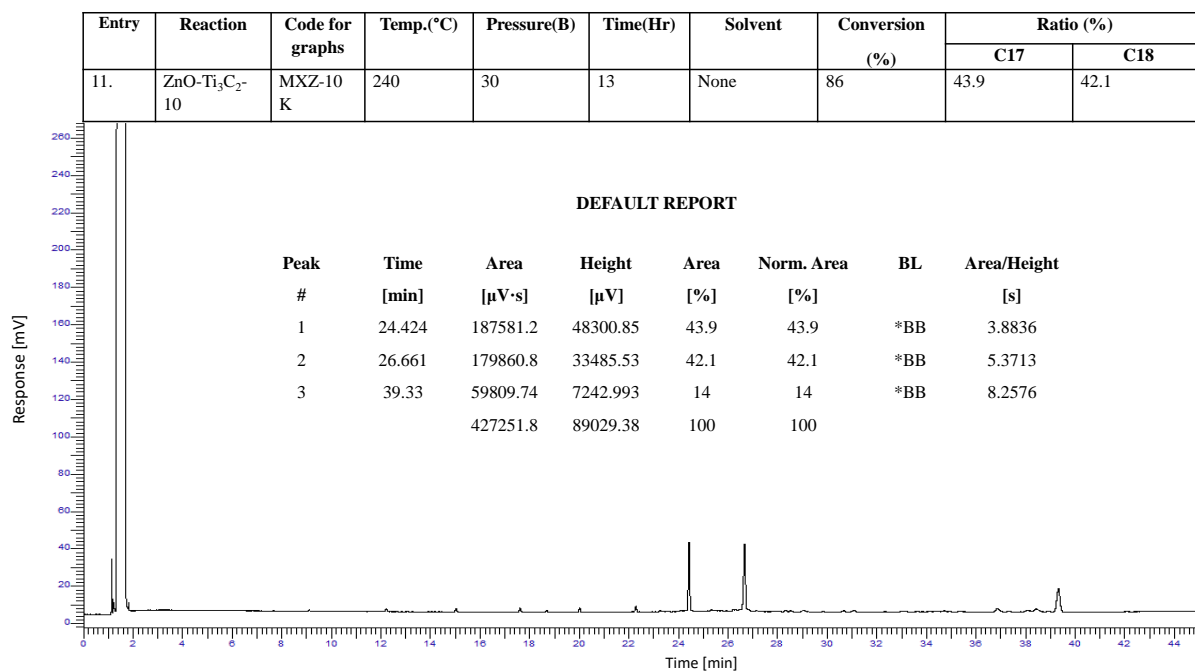

Figure S37: GC chromatogram for biodiesel product over ZnO-Ti<sub>3</sub>C<sub>2</sub>T<sub>x</sub> catalyst (MXZ-10 K).

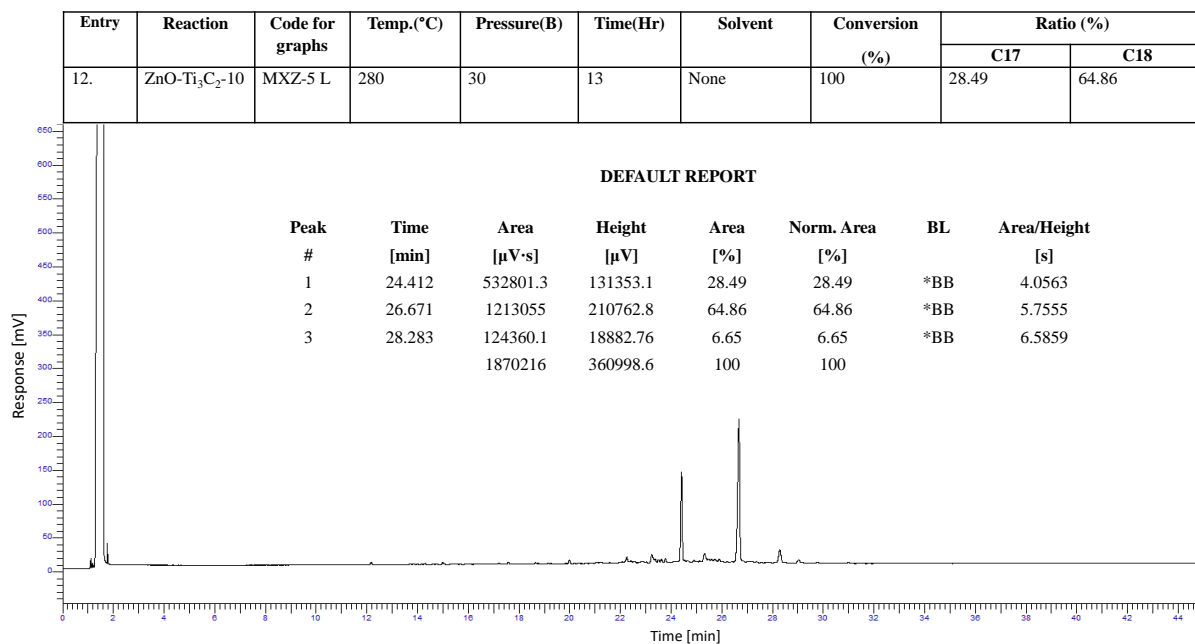

Figure S38: GC chromatogram for biodiesel product over ZnO-Ti<sub>3</sub>C<sub>2</sub>T<sub>x</sub> catalyst (MXZ-5 L).

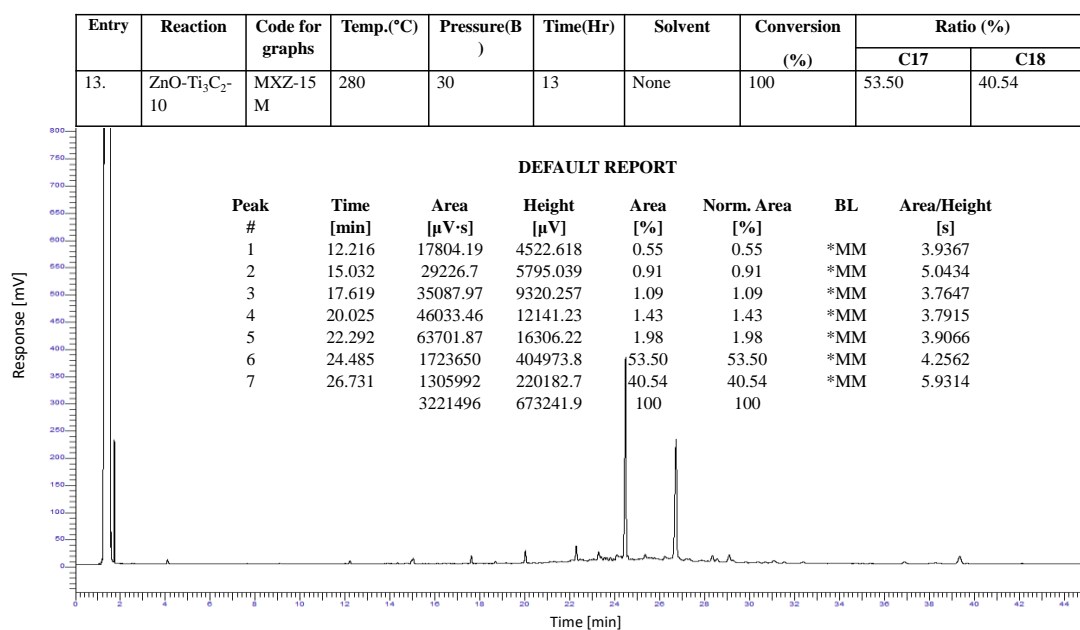

Figure S39: GC chromatogram for biodiesel product over ZnO-Ti<sub>3</sub>C<sub>2</sub>T<sub>x</sub> catalyst (MXZ-15 M).

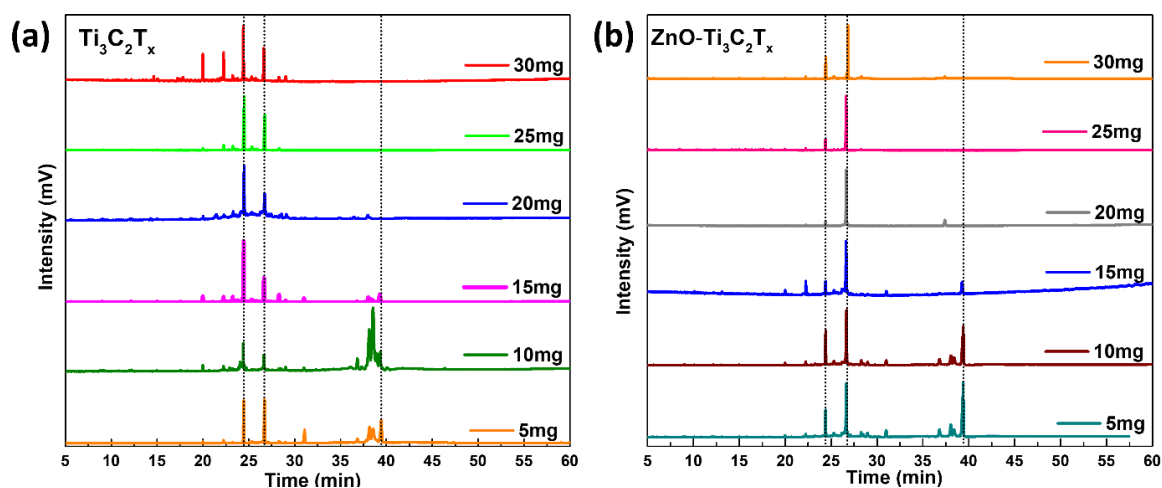

Figure S40. (a and b) GC chromatogram of Ti<sub>3</sub>C<sub>2</sub>T<sub>x</sub> and ZnO-Ti<sub>3</sub>C<sub>2</sub>T<sub>x</sub> with variable catalyst loading.

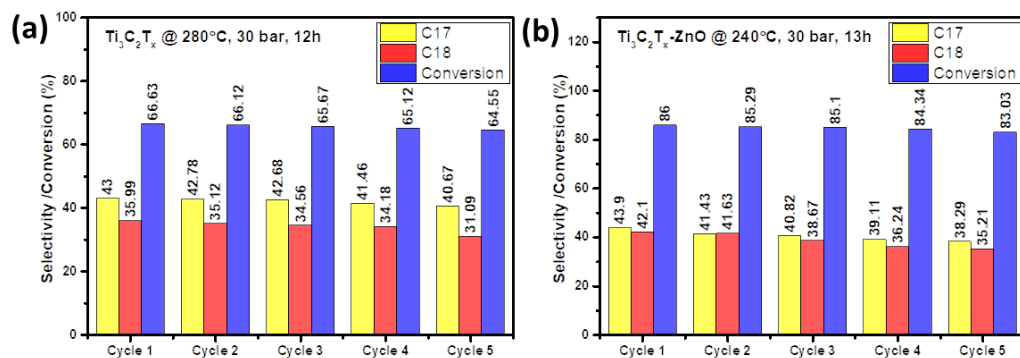

Figure S41. Conversion and selectivity of (a) Ti<sub>3</sub>C<sub>2</sub>T<sub>x</sub> and (b) ZnO-Ti<sub>3</sub>C<sub>2</sub>T<sub>x</sub> up to 5 cycles at lower conversion reactions.

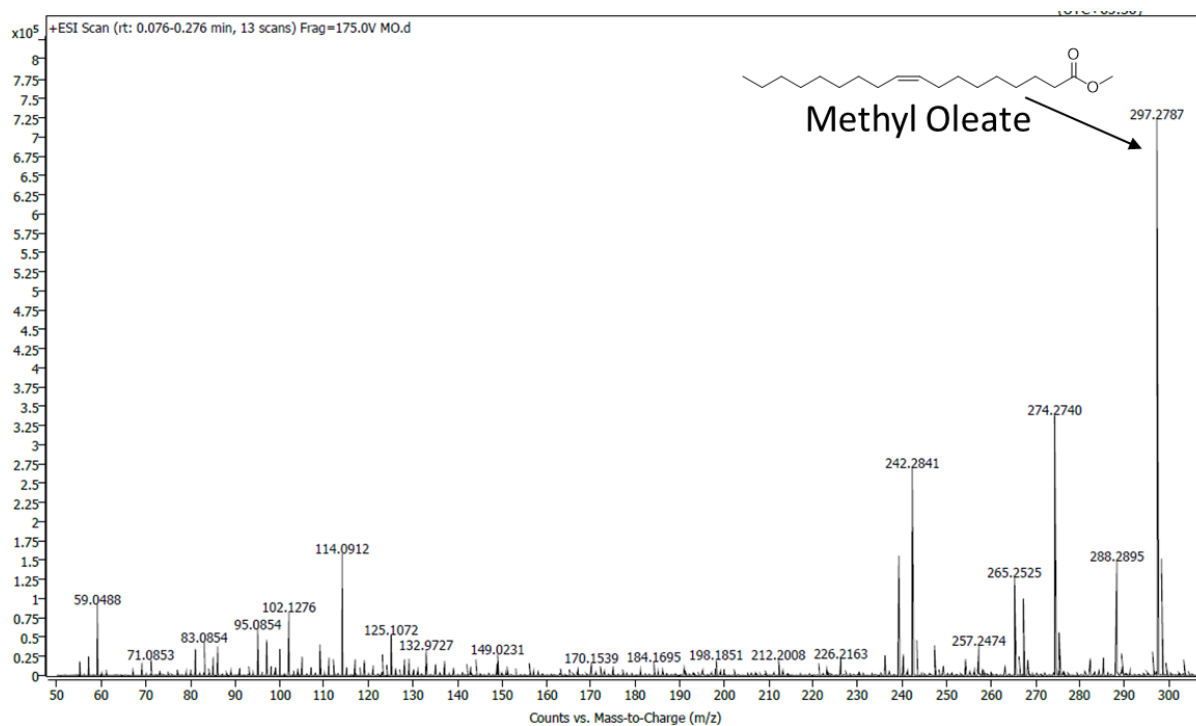

Figure S42: HRMS spectrum of pure methyl oleate (m/z 297.2787).

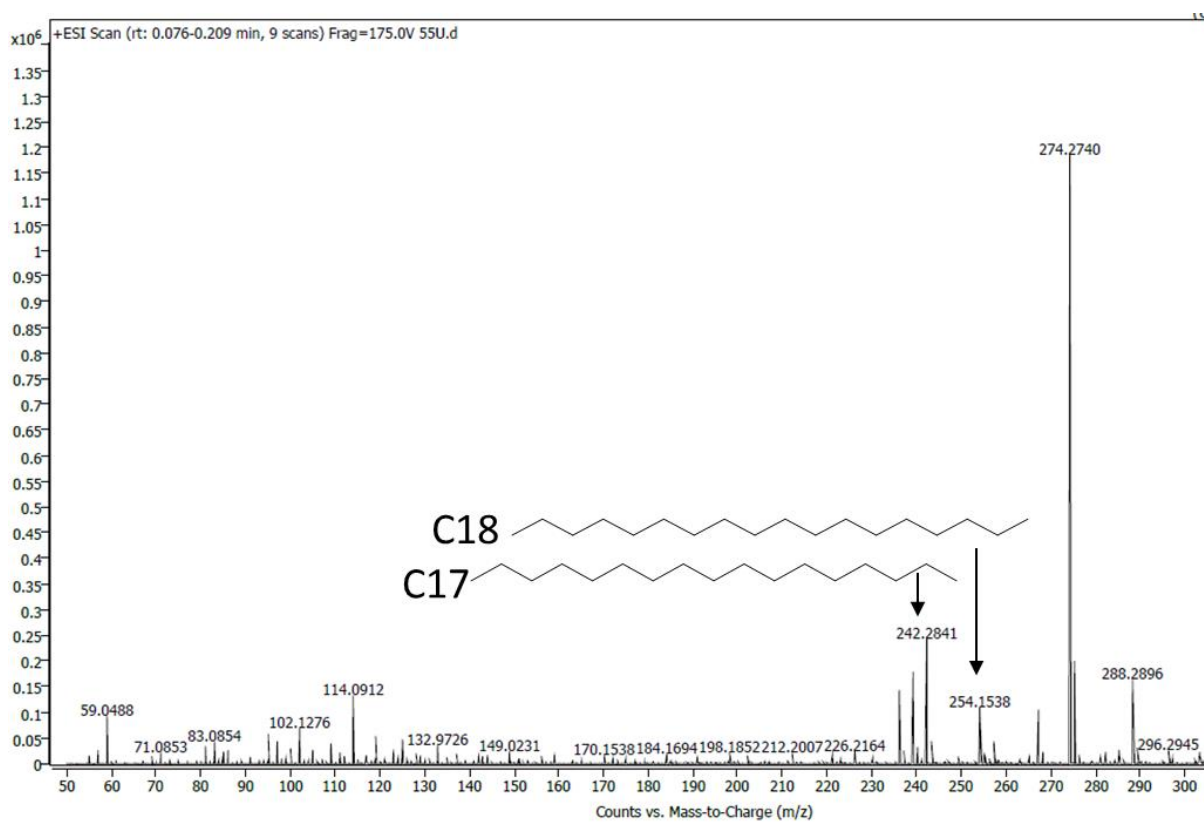

Figure S43: HRMS spectrum of reaction after hydrotreatment process using MXZ-10 catalyst (m/z of C18 (254.1538) and C17 (242.2841)).



# <sup>1</sup>H NMR spectrum

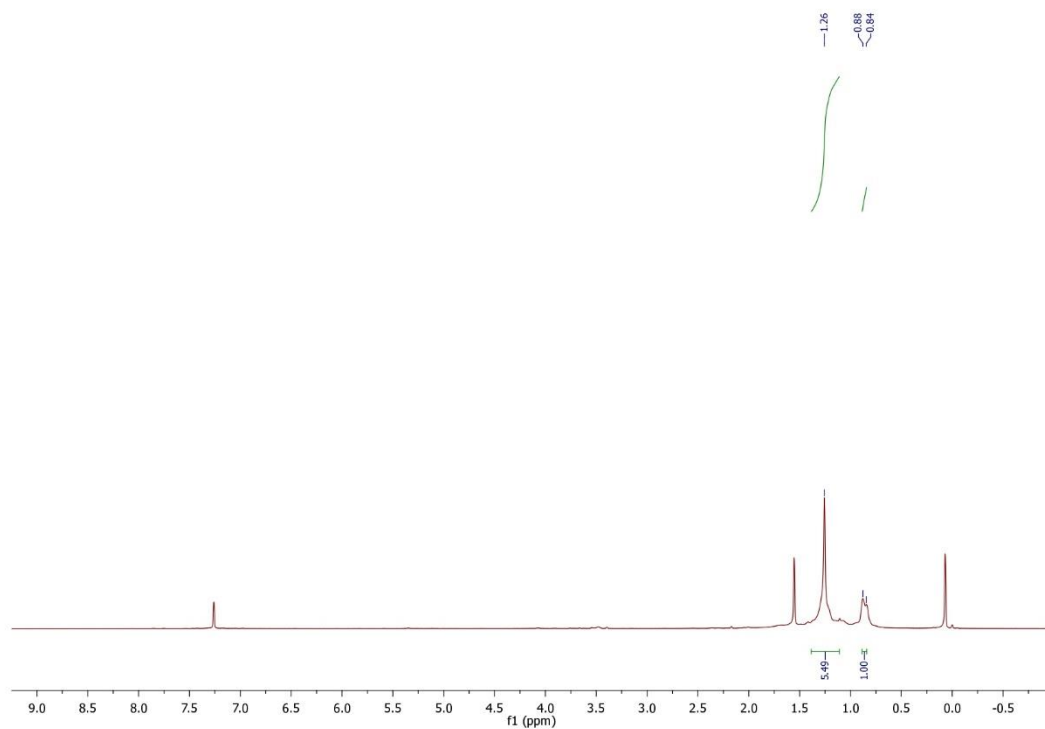

Figure S44: <sup>13</sup>C NMR of hydrotreatment reaction

# <sup>13</sup>C NMR spectrum

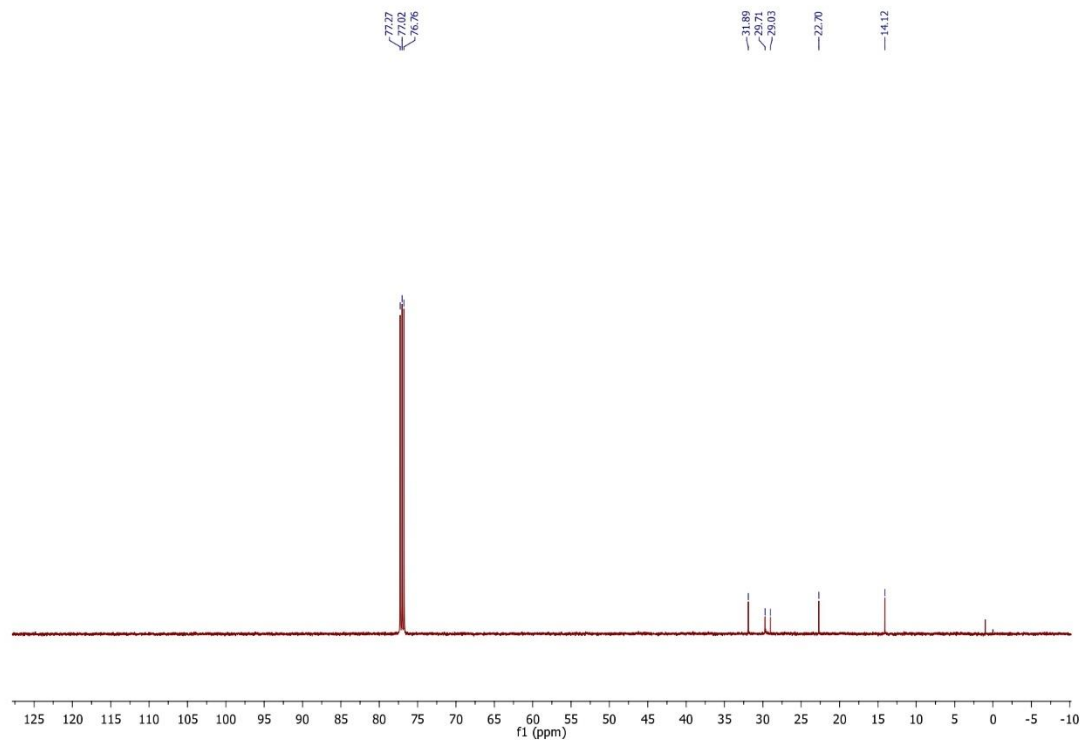

Figure S45:  $^{13}\text{C}$  NMR of hydrotreatment reaction.

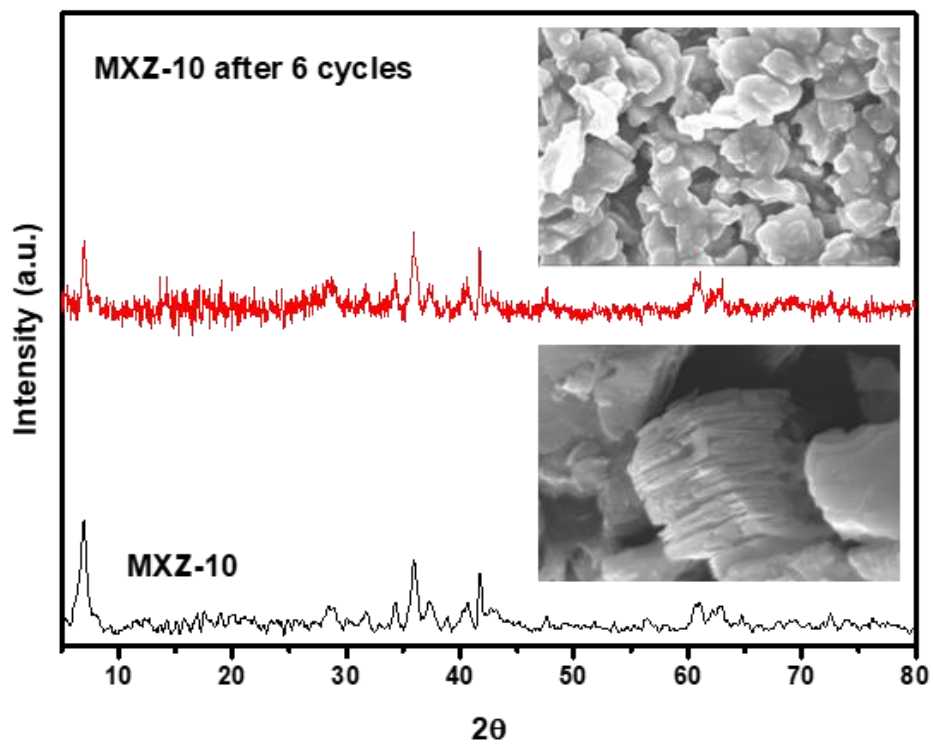

Figure S46: XRD of fresh catalyst and reused catalyst of MXZ-10 with SEM images.

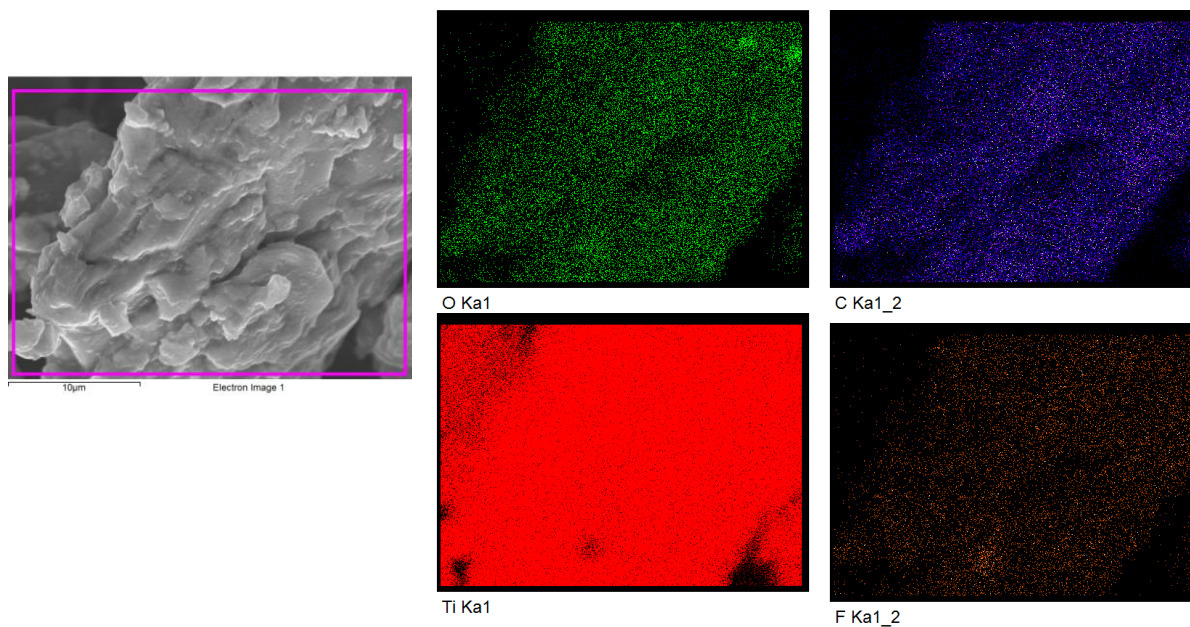

Figure S47: SEM image and EDX elemental mapping after the hydrotreatment process of  $\text{Ti}_3\text{C}_2\text{T}_x$ .

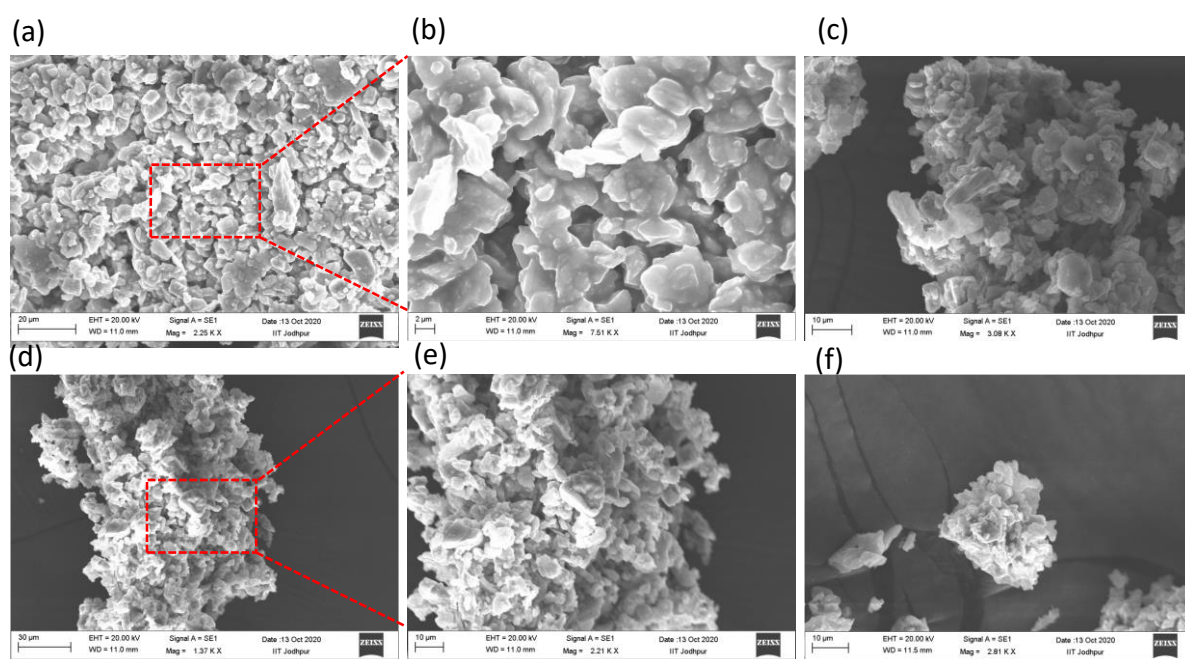

Figure S48: SEM image of  $\text{Ti}_3\text{C}_2\text{T}_x$ , after hydrotreatment reaction at different reaction condition.

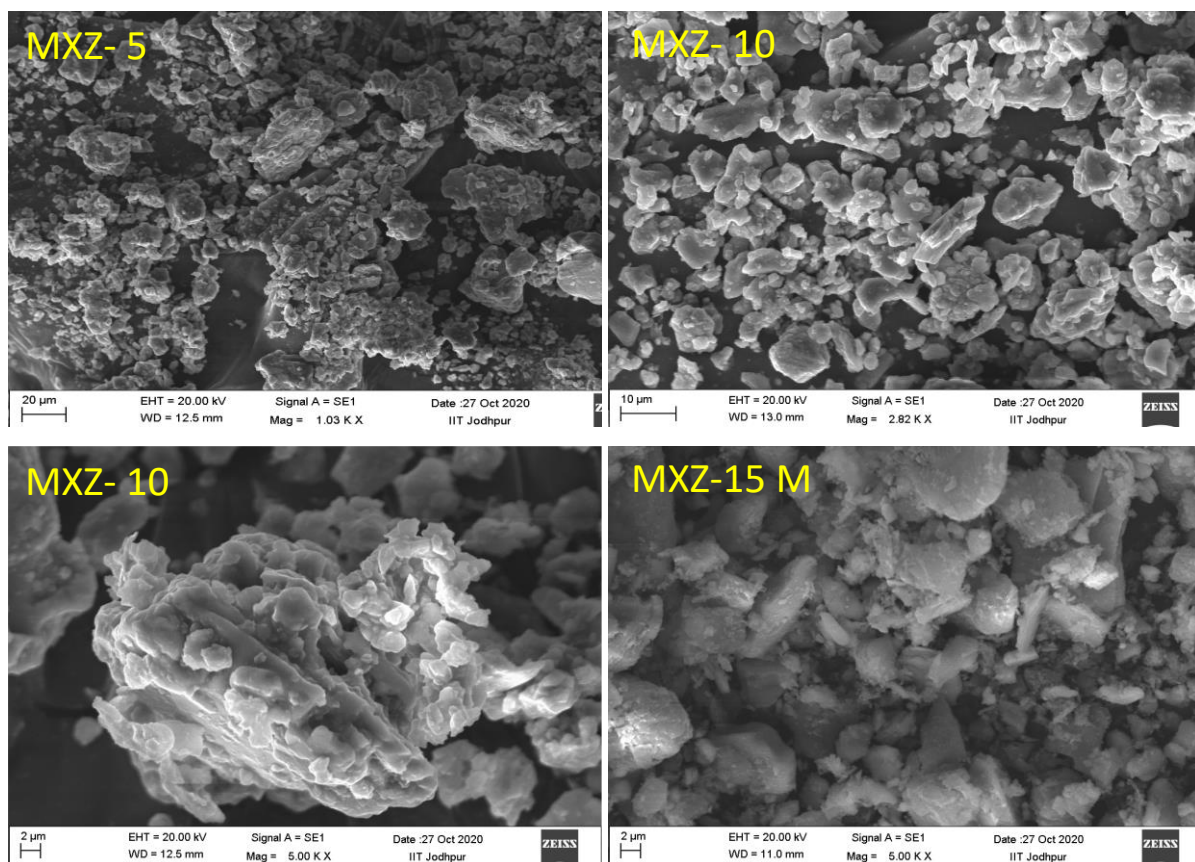

Figure S49: SEM image of  $\text{ZnO-Ti}_3\text{C}_2\text{T}_x$  catalyst after hydrotreatment reaction at different reaction condition.

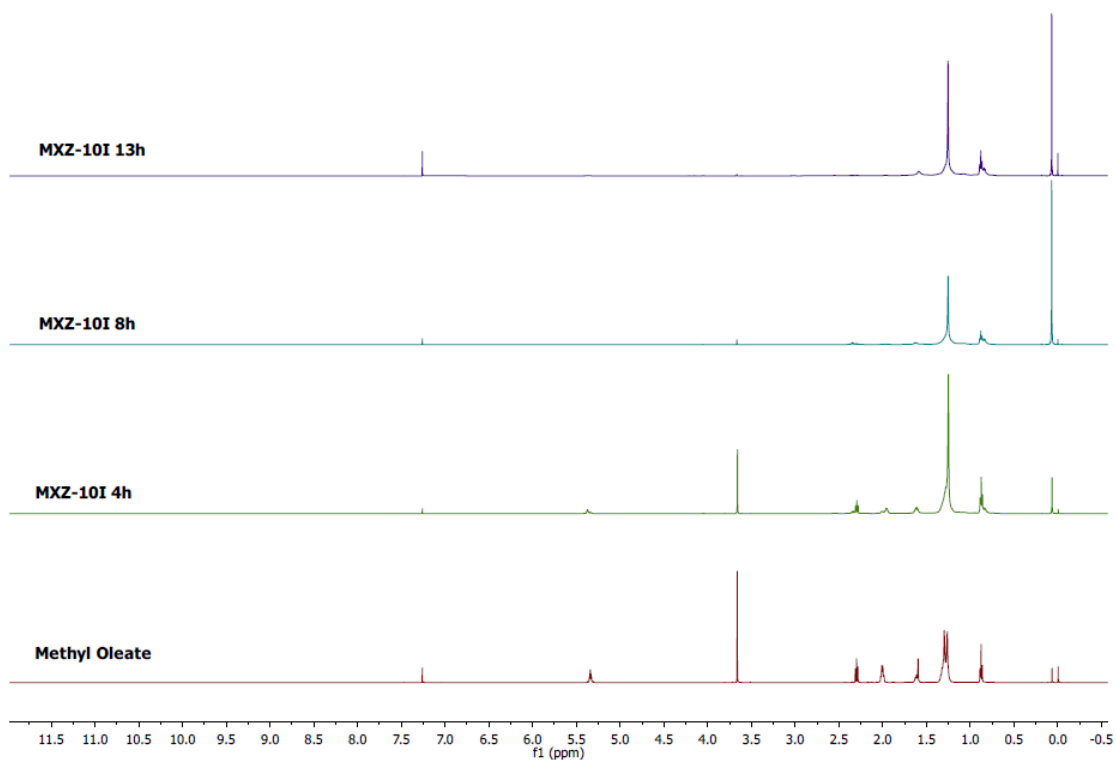

Figure S50: (a)  $^1\text{H}$  NMR of hydrotreatment reaction with time-dependent study.

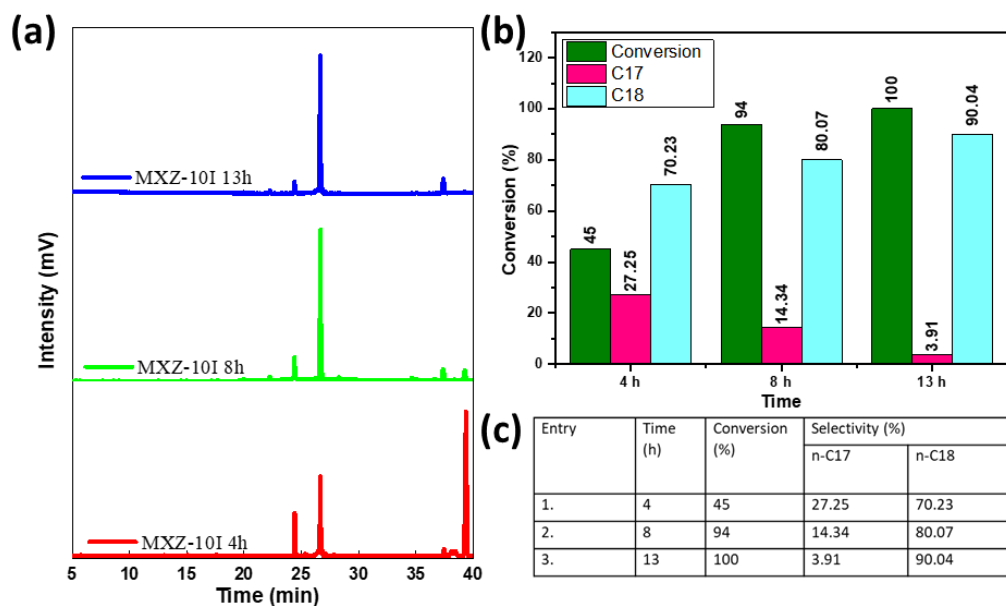

Figure S51: (a) GC chromatogram of hydrotreatment reaction with time-dependent study; (b-c) Conversion and selectivity data of Entry 9 at 4, 8 and 13h.

| Catalyst                                          | Metal loaded | Substrate           | Solvent             | Temp (°C) | Pressure (bar) | Time (h) | Conversion | Selectivity | product          | Ref.       |
|---------------------------------------------------|--------------|---------------------|---------------------|-----------|----------------|----------|------------|-------------|------------------|------------|
| MXene-nano sheet                                  | -            | Guaiacol            | Hexadecane-dodecane | 350       | 50             | 4        | 56         | 61          | Phenol           | [1]        |
| MXene-nano sheet                                  | -            | Guaiacol            | hexadecane-dodecane | 350       | 50             | 4        | 56         | 17          | methylanisole    | [1]        |
| Ti-based MXene                                    | -            | furfural            | 2-propanol          | 180       | 5              | 48       | 62         | 49          | Furfuryl alcohol | [2]        |
| MXene                                             | Ni           | Palmitic Acid       | decane              | 300       | 40             | 4        | 100        | 78.11       | Alkane           | [3]        |
| MoO <sub>2</sub> @Mo <sub>2</sub> CT <sub>x</sub> | Ni           | Palmitic Acid       | decane              | 280       | 2              | 4        | 100        | 97.09       | Alkane           | [3]        |
| Ti <sub>3</sub> C <sub>2</sub> N-CNT              | Co           | Propyne             |                     | 150       | 1              | 5.4      | 99         | 96          | propene          | [4]        |
| Ti <sub>3</sub> C <sub>2</sub> Tx                 | Pt           | pchloronitrobenzene | Ethanol-water       | 30        | 10             | 1        | 100        | 99.5        | p-chloroaniline  | [5]        |
| Ti <sub>3</sub> C <sub>2</sub> Tx                 |              | Methyl Oleate       | Solvent-free        | 300       | 30             | 15       | 100        | 61.3        | C17              | This study |
| Ti <sub>3</sub> C <sub>2</sub> Tx                 | Zn           | Methyl Oleate       | Solvent-free        | 280       | 30             | 13       | 100        | 90.04       | C18              | This study |

**Table S1:** Comparative study of MXene and MXene-ZnO catalyst with previously reported study.

References:

- [1] E. Blanco, A. Rosenkranz, R. Espinoza-González, V.M. Fuenzalida, Z. Zhang, S. Suárez, N. Escalona, Catalytic performance of 2D-Mxene nano-sheets for the hydrodeoxygenation (HDO) of lignin-derived model compounds, *Catalysis Communications* 133 (2020) 105833. <https://doi.org/https://doi.org/10.1016/j.catcom.2019.105833>.
- [2] M. Naguib, W. Tang, K.L. Browning, G.M. Veith, V. Maliekkal, M. Neurock, A. Villa, Catalytic Activity of Ti-based MXenes for the Hydrogenation of Furfural, *ChemCatChem* 12(22) (2020) 5733-5742. <https://doi.org/https://doi.org/10.1002/cctc.202000977>.
- [3] J. Liang, T. Chen, J. Liu, Q. Zhang, W. Peng, Y. Li, F. Zhang, X. Fan, Chemoselective hydrodeoxygenation of palmitic acid to diesel-like hydrocarbons over Ni/MoO<sub>2</sub>@Mo<sub>2</sub>C<sub>Tx</sub> catalyst with extraordinary synergic effect, *Chemical Engineering Journal* 391 (2020) 123472. <https://doi.org/https://doi.org/10.1016/j.cej.2019.123472>.
- [4] J. Chen, M. Chu, F. Lyu, J. Gong, L. Wu, L. Liu, Y. Xu, Q. Zhang, Strong Synergy between Ti<sub>3</sub>C<sub>2</sub> and N-Doped Co Nanoparticles Boosts the Selective Hydrogenation of Propyne, *Industrial & Engineering Chemistry Research* 58(47) (2019) 21413-21418. <https://doi.org/10.1021/acs.iecr.9b05234>.
- [5] Q. Chen, W. Jiang, G. Fan, Pt nanoparticles on Ti<sub>3</sub>C<sub>2</sub>T<sub>x</sub>-based MXenes as efficient catalysts for the selective hydrogenation of nitroaromatic compounds to amines, *Dalton Transactions* 49(42) (2020) 14914-14920. <https://doi.org/10.1039/D0DT02594A>.
